# Supplementary material for: Et3N-promoted tandem ring-opening reaction of N-tosylaziridines with terminal alkynoates: a straightforward synthesis of functionalized enamines
Source: Royal Society of Chemistry journal article supplement (doi:10.1039/c2cc30317e), 2012-01-01

## Supporting Information

### Et<sub>3</sub>N-Promoted Tandem Ring-Opening Reaction of *N*-Tosylaziridines with Terminal Alkynoates: A Straightforward Synthesis of Functionalized Enamines

Ling-Guo Meng<sup>a</sup> and Lei Wang<sup>\*a,b</sup>

<sup>a</sup> Department of Chemistry, Huaibei Normal University, Huaibei, Anhui 235000, P. R. China

<sup>b</sup> State Key Laboratory of Organometallic Chemistry, Shanghai Institute of Organic Chemistry, Chinese Academy of Sciences, Shanghai 200032, P. R. China

leiwang@chnu.edu.cn

#### General Remarks

All reactions were conducted in oven-dried glassware with magnetic stirring. Chromatographic purification was performed on silica gel (100–200 mesh) and analytical thin layer chromatography (TLC) on silica gel 60-F<sub>254</sub> (Qindao), which was detected by fluorescence. <sup>1</sup>H NMR (400 or 300 MHz) and <sup>13</sup>C NMR (100 or 75 MHz) spectra were measured with a Bruker AC 400 or 300 spectrometer with CDCl<sub>3</sub> as solvent and recorded in ppm relative to internal tetramethylsilane standard. <sup>1</sup>H NMR data are reported as follows: δ, chemical shift; coupling constants (*J* are given in Hertz, Hz) and integration. Abbreviations to denote the multiplicity of a particular signal were s (singlet), d (doublet), t (triplet), q (quartet), quint (quintet), sext (sextet), m (multiplet), and br (broad singlet). High resolution mass spectra were obtained with a Micromass GCT-TOF mass spectrometer. IR spectra were recorded as thin films or as solids in KBr pellets on a Perkin-Elmer FT210 spectrophotometer. Melting points were determined on a digital melting point apparatus and temperatures were uncorrected.

#### Preparation of the Deuterium-Labeled Aziridine 1a-D

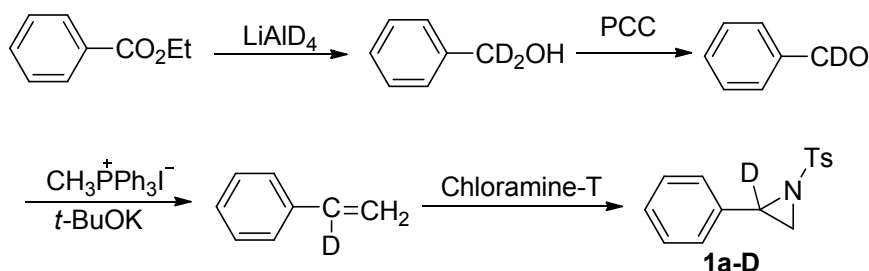

To a solution of lithium aluminium deuteride (11.9 mmol) in THF (20 mL) were added a THF solution (15 mL) of ethyl benzoate (22.0 mmol) at room temperature, and the mixture was heated at the reflux temperature under an argon atmosphere for 3 h. The reaction was quenched by the addition of 4 M KOH aq. and extraction with ethyl acetate three times furnished an organic layer, which was dried and concentrated. The residue was purified by silica gel chromatography (petroleum ether/EtOAc = 10:1), which furnished benzyl- $\alpha,\alpha$ - $d_2$  alcohol as a colorless oil.

Pyridinium chlorochromate (40 mmol) was added to a stirred solution of benzyl- $\alpha,\alpha$ - $d_2$  alcohol (19.5 mmol) in  $\text{CH}_2\text{Cl}_2$  (100 mL), the mixture was then stirred overnight at room temperature. The resulting solution was filtered and the benz(aldehyde- $d$ ) was obtained as a colorless oil by silica gel chromatography (petroleum ether/EtOAc = 10:1).

To a 100 mL round-bottomed flask contained ether solution (30 mL) of  $\text{CH}_3\text{PPh}_3\text{I}$  (10 mmol) and a magnetic stirring bar under  $\text{N}_2$ , was added *t*-BuOK (11 mmol) and the mixture was stirred for 3 h, whereupon bright-yellow precipitates formed. Then to the reaction mixture was successively added ether solution of benz(aldehyde- $d$ ) (10 mmol) and stirred at room temperature overnight and fluxed for 4 h. After the precipitates were filtered off, the resulting clear solution was washed with water, dried over  $\text{MgSO}_4$ . Then the solvent was removed in vacuo and residue was purified by column chromatography on silica gel to afford styrene- $\alpha$ - $d_1$  as colorless oil.

The styrene- $\alpha$ - $d_1$  (4.0 mmol) was added to a solution of iodine (0.2 mmol), Chloramine-T (2.0 mmol) in acetonitrile/water solution (1.5 mL/1.5 mL). The solution was stirred overnight at room temperature. Then the solution was diluted by  $\text{CH}_2\text{Cl}_2$ , dried by  $\text{MgSO}_4$ . Purification by flash column chromatography gave the aziridine **1a-D**.

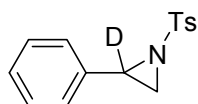

White solid. Mp: 81–82 °C.  $^1\text{H}$  NMR (300 MHz,  $\text{CDCl}_3$ ):  $\delta$ , 7.87 (d,  $J$  = 8.4 Hz, 2H), 7.32–7.18 (m, 7H), 2.96 (s, 1H), 2.41 (s, 3H), 2.36 (s, 1H).  $^{13}\text{C}$  NMR (75 MHz,  $\text{CDCl}_3$ ):  $\delta$ , 144.5, 134.9, 134.9, 129.6, 128.4, 128.2, 127.8, 126.4, 41.0 (t,  $J$  = 26 Hz), 35.7, 21.5. IR (neat,  $\text{cm}^{-1}$ ):  $\nu$  1608; HRMS (ESI) calcd for  $\text{C}_{15}\text{H}_{14}\text{DNO}_2\text{S}$  ( $\text{M}+\text{Na}$ ) $^+$ : 297.0778; Found: 297.0773.

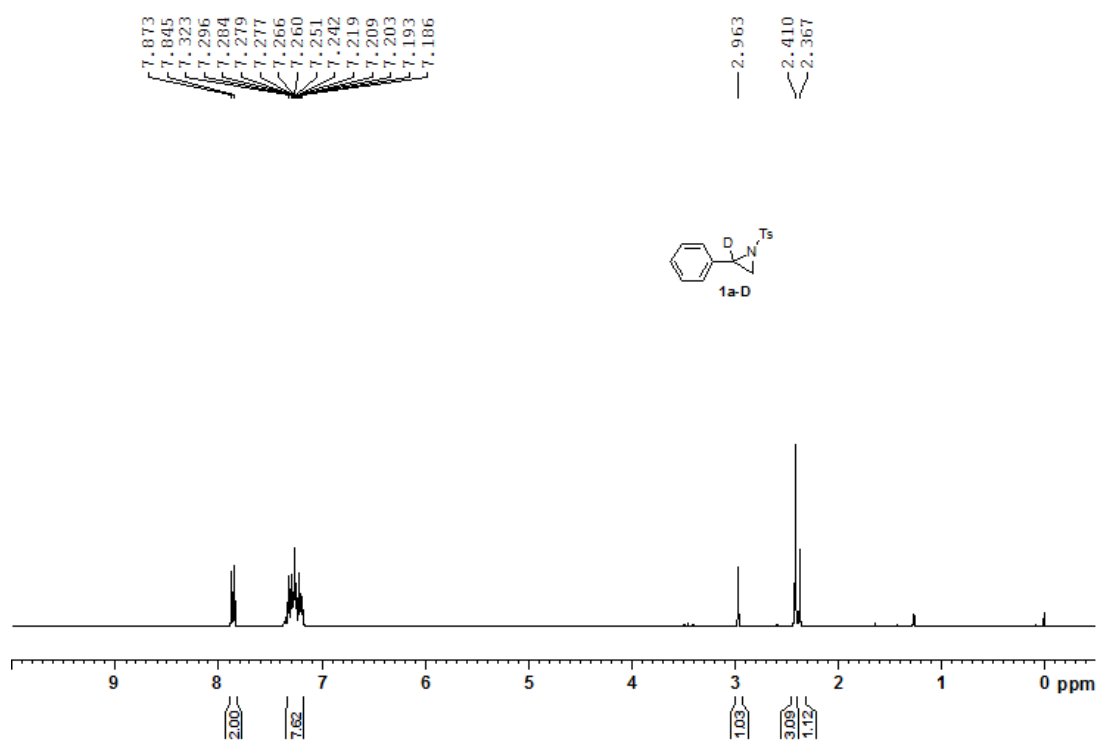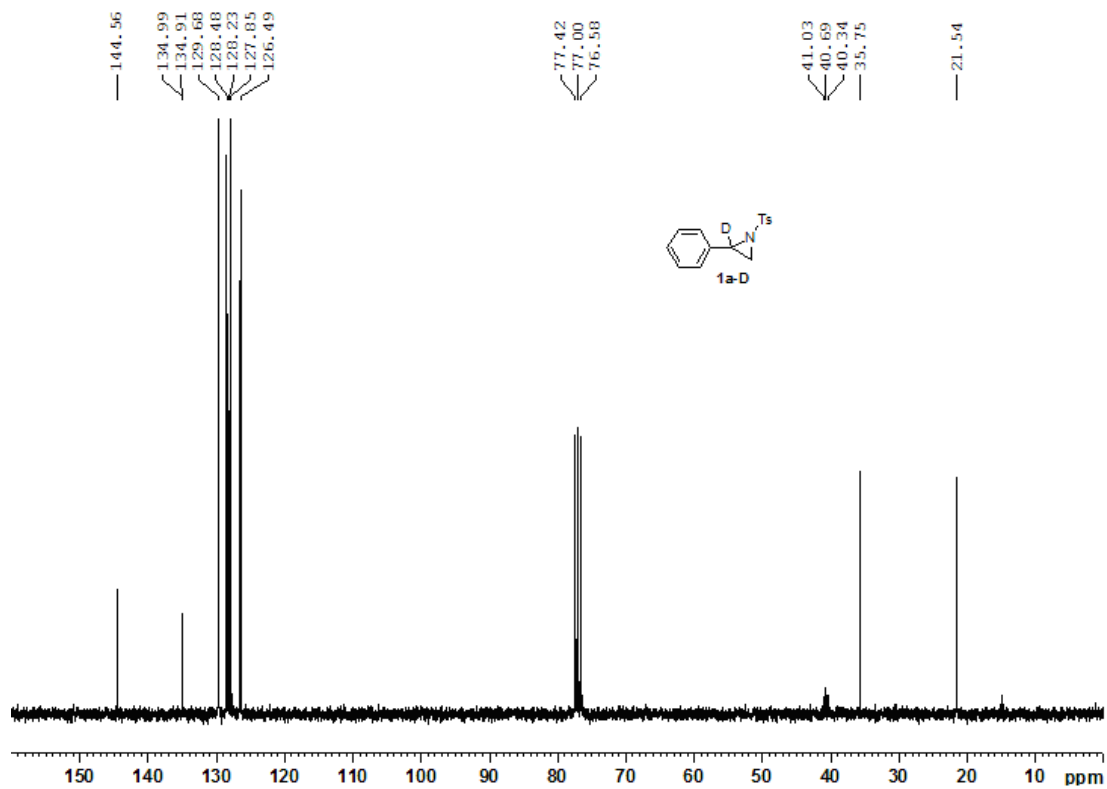

## Deuterium labeling experimental results, and the effect of water on the reaction by using D<sub>2</sub>O

In order to explore the mechanism of Et<sub>3</sub>N-promoted the reaction of *N*-tosylaziridines with terminal alkynoates, an isotopic labeling experiment was conducted. The deuterium-labeled 2-phenyl-1-tosylaziridine **1a-D** (>99% D) was subjected to the reaction with ethyl propiolate, but the isotope deuterium was lost in the desired product. So we speculated that the formation of this result was due to the presence of a few water in the reaction system. To prove our hypothesis, 1.0 equiv D<sub>2</sub>O was added to the reaction of 2-phenyl-1-tosylaziridine **1a** with ethyl propiolate. We obtained the product enamine in yields comparable to those of the non-deuterated product enamine with 15 and 27% D at α-carbon and β-carbon atoms, respectively, and the ratio of isotope of D was further improved by increasing the amount of D<sub>2</sub>O added to the reaction system.

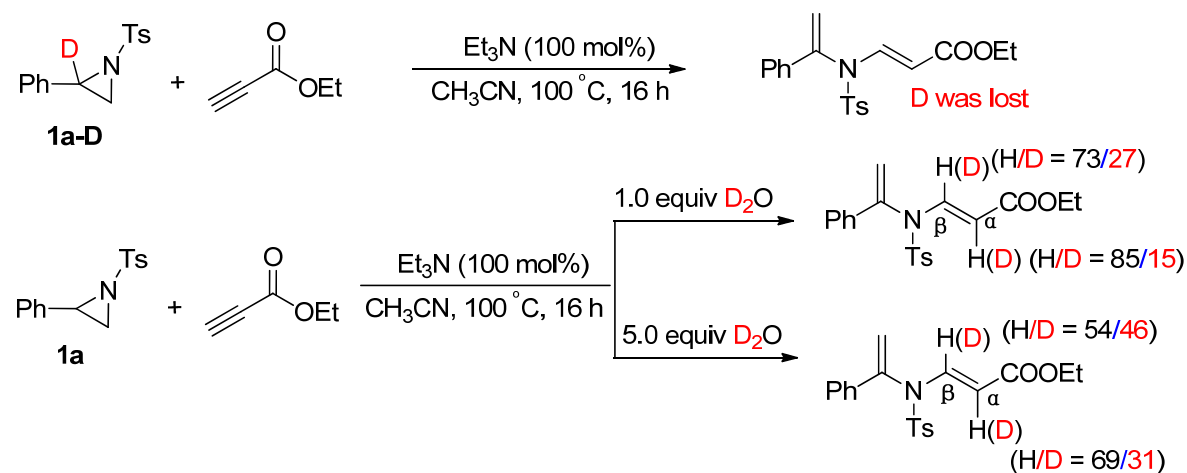

**Fig. 1** Deuterium labeling experimental results, and the effect of water on the reaction

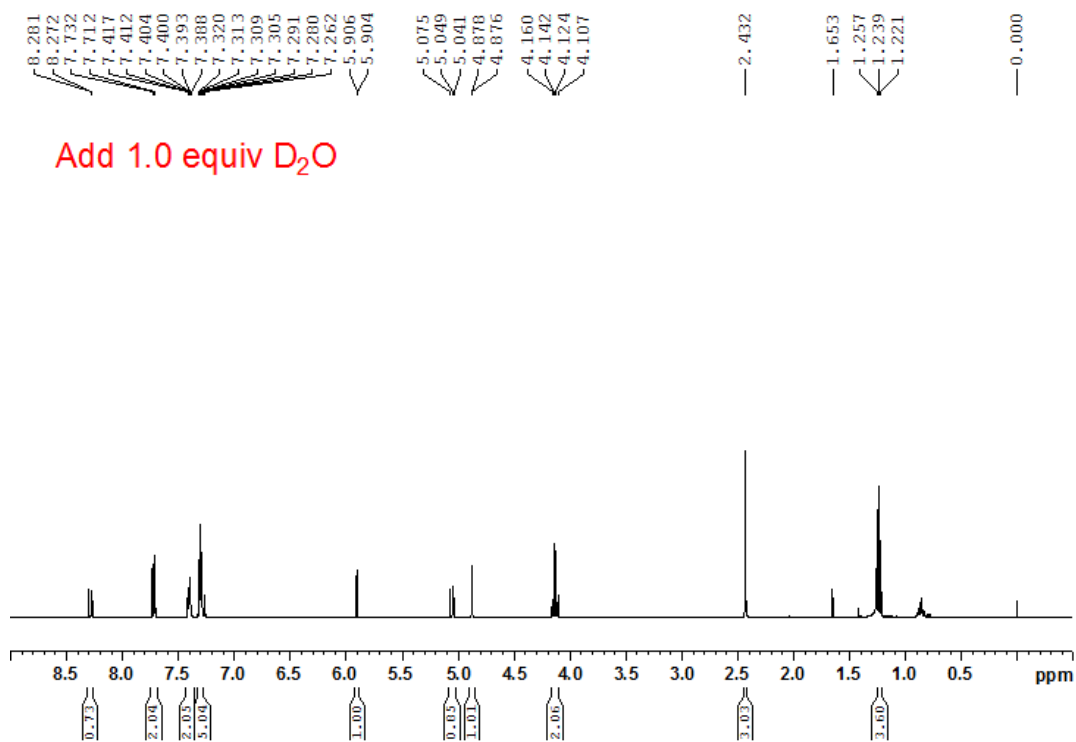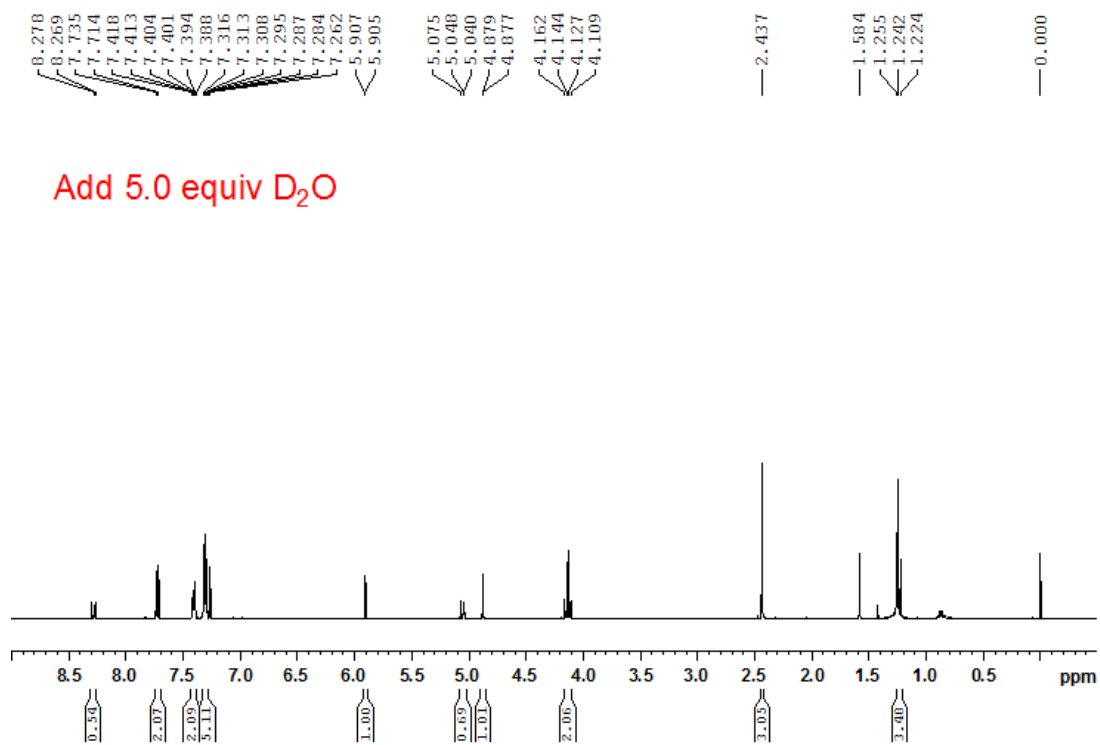

## General Procedure for the Tandem Ring-opening Reactions of Aziridines with Terminal Alkynoates Promoted by Et<sub>3</sub>N

To a solution of aziridines (0.2 mmol) with terminal alkynoates (0.4 mmol) in CH<sub>3</sub>CN (2.0 mL) was added Et<sub>3</sub>N (28 μL, 0.2 mmol). The mixture was then stirred at 100 °C for 16 h in a reaction flask. Then the solvent was removed in vacuo and residue was purified by column chromatography on silica gel (petroleum ether/EtOAc = 20:1) to give the desired product.

### (*E*)-Ethyl 3-(4-methyl-*N*-(1-phenylvinyl)phenylsulfonamido)acrylate (3a)

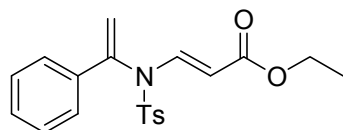

Pale yellow oil. <sup>1</sup>H NMR (400 MHz, CDCl<sub>3</sub>): δ, 8.30 (d, *J* = 13.6 Hz, 1H), 7.72 (d, *J* = 8.4 Hz, 2H), 7.41–7.38 (m, 2H), 7.30–7.25 (m, 5H), 5.90 (d, *J* = 0.8 Hz, 1H), 5.07 (d, *J* = 13.6 Hz, 1H), 4.88 (d, *J* = 0.8 Hz, 1H), 4.15 (q, *J* = 7.2 Hz, 2H), 2.42 (s, 3H), 1.25 (t, *J* = 7.2 Hz, 3H). <sup>13</sup>C NMR (100 MHz, CDCl<sub>3</sub>): δ, 167.0, 144.8, 142.4, 141.9, 135.2, 134.0, 129.8, 129.2, 128.6, 127.8, 125.8, 117.3, 100.5, 60.0, 21.5, 14.2. IR (neat, cm<sup>-1</sup>): ν 1708, 1621; HRMS (EI) calcd for C<sub>20</sub>H<sub>21</sub>NO<sub>4</sub>S (M<sup>+</sup>): 371.1190; Found: 371.1191.

### (*E*)-Ethyl 3-(*N*-(1-(4-fluorophenyl)vinyl)-4-methylphenylsulfonamido)acrylate (3b)

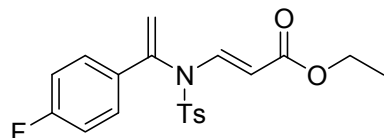

Pale yellow oil. <sup>1</sup>H NMR (400 MHz, CDCl<sub>3</sub>): δ, 8.28 (d, *J* = 13.6 Hz, 1H), 7.73 (d, *J* = 8.4 Hz, 2H), 7.41–7.37 (m, 2H), 7.32 (d, *J* = 8.4 Hz, 2H), 7.01–6.96 (m, 2H), 5.83 (d, *J* = 0.8 Hz, 1H), 5.06 (d, *J* = 13.6 Hz, 1H), 4.85 (d, *J* = 0.8 Hz, 1H), 4.17 (q, *J* = 7.2 Hz, 2H), 2.44 (s, 3H), 1.26 (t, *J* = 7.2 Hz, 3H). <sup>13</sup>C NMR (100 MHz, CDCl<sub>3</sub>): δ, 166.9, 164.5 (d, *J* = 248.3 Hz), 145.0, 142.2, 141.0, 135.1, 130.3 (d, *J* = 3.6 Hz), 129.9, 127.8 (d, *J* = 8.3 Hz), 127.8, 117.1 (d, *J* = 1.7 Hz), 115.8 (d, *J* = 21.8 Hz), 100.6, 60.1, 21.6, 14.2. IR (neat, cm<sup>-1</sup>): ν 1707, 1623; HRMS (ESI) calcd

for  $C_{20}H_{20}FNO_4S$  ( $M+H$ )<sup>+</sup>: 390.1169; Found: 390.1173.

**(E)-Ethyl 3-(N-(1-(4-chlorophenyl)vinyl)-4-methylphenylsulfonamido)acrylate (3c)**

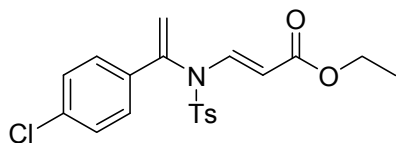

Pale yellow oil. <sup>1</sup>H NMR (400 MHz, CDCl<sub>3</sub>): δ, 8.28 (d, *J* = 13.6 Hz, 1H), 7.73 (d, *J* = 8.4 Hz, 2H), 7.35–7.25 (m, 6H), 5.89 (d, *J* = 0.8 Hz, 1H), 5.04 (d, *J* = 13.6 Hz, 1H), 4.90 (d, *J* = 0.8 Hz, 1H), 4.17 (q, *J* = 7.2 Hz, 2H), 2.44 (s, 3H), 1.26 (t, *J* = 7.2 Hz, 3H). <sup>13</sup>C NMR (100 MHz, CDCl<sub>3</sub>): δ, 166.9, 145.1, 142.2, 141.0, 135.3, 135.0, 132.6, 130.0, 128.8, 127.8, 127.1, 117.8, 100.6, 60.1, 21.6, 14.2. IR (neat, cm<sup>-1</sup>): ν 1708, 1622; HRMS (ESI) calcd for  $C_{20}H_{20}^{35}ClNO_4S$  ( $M+H$ )<sup>+</sup>: 406.0874; Found: 406.0875.

**(E)-Ethyl 3-(N-(1-(4-bromophenyl)vinyl)-4-methylphenylsulfonamido)acrylate (3d)**

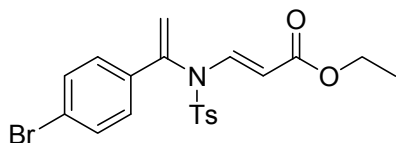

Pale yellow oil. <sup>1</sup>H NMR (400 MHz, CDCl<sub>3</sub>): δ, 8.28 (d, *J* = 13.6 Hz, 1H), 7.72 (d, *J* = 8.4 Hz, 2H), 7.43 (d, *J* = 8.4 Hz, 2H), 7.32–7.26 (m, 4H), 5.91 (d, *J* = 0.8 Hz, 1H), 5.04 (d, *J* = 13.6 Hz, 1H), 4.90 (d, *J* = 0.8 Hz, 1H), 4.17 (q, *J* = 7.2 Hz, 2H), 2.44 (s, 3H), 1.26 (t, *J* = 7.2 Hz, 3H). <sup>13</sup>C NMR (100 MHz, CDCl<sub>3</sub>): δ, 166.8, 145.1, 142.2, 141.0, 135.0, 133.0, 131.8, 130.0, 127.8, 127.4, 123.5, 117.9, 100.6, 60.1, 21.6, 14.3. IR (neat, cm<sup>-1</sup>): ν 1707, 1621; HRMS (ESI) calcd for  $C_{20}H_{20}^{79}BrNO_4S$  ( $M+H$ )<sup>+</sup>: 450.0369; Found: 450.0375.

**(E)-Ethyl 3-(N-(1-(4-methoxyphenyl)vinyl)-4-methylphenylsulfonamido)acrylate (3e)**

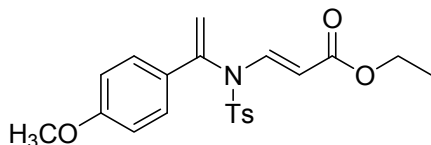

Pale yellow oil. <sup>1</sup>H NMR (400 MHz, CDCl<sub>3</sub>): δ, 8.29 (d, *J* = 13.6 Hz, 1H), 7.74 (d, *J* = 8.4 Hz, 2H), 7.36–7.27 (m, 4H), 6.83 (d, *J* = 8.4 Hz, 2H), 5.76 (d, *J* = 0.8 Hz, 1H), 5.08 (d, *J* = 13.6 Hz,

1H), 4.73 (d,  $J = 0.8$  Hz, 1H), 4.17 (q,  $J = 7.2$  Hz, 2H), 3.80 (s, 3H), 2.44 (s, 3H), 1.26 (t,  $J = 7.2$  Hz, 3H).  $^{13}\text{C}$  NMR (100 MHz,  $\text{CDCl}_3$ ):  $\delta$ , 167.1, 160.4, 144.8, 142.4, 141.6, 135.3, 129.8, 127.8, 127.3, 126.5, 115.0, 114.0, 100.4, 60.0, 55.3, 21.5, 14.2. IR (neat,  $\text{cm}^{-1}$ )  $\nu$  1707, 1621; HRMS (ESI) calcd for  $\text{C}_{21}\text{H}_{23}\text{NO}_5\text{S}$  ( $\text{M}+\text{H}$ ) $^+$ : 402.1369; Found: 402.1371.

**(E)-Ethyl 3-(4-methyl-N-(1-p-tolylvinyl)phenylsulfonamido)acrylate (3f)**

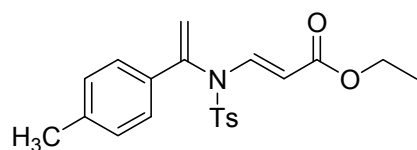

Pale yellow oil.  $^1\text{H}$  NMR (400 MHz,  $\text{CDCl}_3$ ):  $\delta$ , 8.30 (d,  $J = 13.6$  Hz, 1H), 7.74–7.72 (m, 2H), 7.33–7.29 (m, 4H), 7.12 (d,  $J = 8.0$  Hz, 2H), 5.85 (d,  $J = 0.8$  Hz, 1H), 5.08 (d,  $J = 13.6$  Hz, 1H), 4.81 (d,  $J = 0.8$  Hz, 1H), 4.16 (q,  $J = 7.2$  Hz, 2H), 2.44 (s, 3H), 2.33 (s, 3H), 1.26 (t,  $J = 7.2$  Hz, 3H).  $^{13}\text{C}$  NMR (100 MHz,  $\text{CDCl}_3$ ):  $\delta$ , 167.0, 144.8, 142.4, 141.9, 139.3, 135.3, 131.1, 129.8, 129.3, 127.8, 125.7, 116.1, 100.4, 60.0, 21.5, 21.1, 14.2. IR (neat,  $\text{cm}^{-1}$ )  $\nu$  1706, 1621; HRMS (ESI) calcd for  $\text{C}_{21}\text{H}_{23}\text{NO}_4\text{S}$  ( $\text{M}+\text{H}$ ) $^+$ : 386.1420; Found: 386.1432.

**(E)-Ethyl 3-(N-(1-(2-chlorophenyl)vinyl)-4-methylphenylsulfonamido)acrylate (3g)**

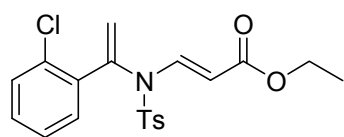

Pale yellow oil.  $^1\text{H}$  NMR (400 MHz,  $\text{CDCl}_3$ ):  $\delta$ , 8.25 (d,  $J = 13.6$  Hz, 1H), 7.64 (d,  $J = 8.4$  Hz, 2H), 7.41–7.32 (m, 2H), 7.28–7.20 (m, 4H), 5.91 (s, 1H), 5.40 (d,  $J = 13.6$  Hz, 1H), 5.28 (s, 1H), 4.21 (q,  $J = 7.2$  Hz, 2H), 2.43 (s, 3H), 1.30 (t,  $J = 7.2$  Hz, 3H).  $^{13}\text{C}$  NMR (100 MHz,  $\text{CDCl}_3$ ):  $\delta$ , 167.2, 144.8, 142.7, 138.3, 135.0, 134.1, 132.6, 130.4, 130.2, 129.8, 129.7, 127.7, 126.9, 123.9, 100.7, 60.1, 21.6, 14.3. IR (neat,  $\text{cm}^{-1}$ )  $\nu$  1708, 1621; HRMS (ESI) calcd for  $\text{C}_{20}\text{H}_{20}^{35}\text{ClNO}_4\text{S}$  ( $\text{M}+\text{H}$ ) $^+$ : 406.0874; Found: 406.0880.



**(E)-Ethyl 3-(N-(1-(3-chlorophenyl)vinyl)-4-methylphenylsulfonamido)acrylate (3h)**

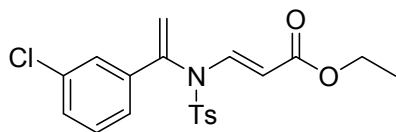

Pale yellow oil.  $^1\text{H}$  NMR (400 MHz,  $\text{CDCl}_3$ ):  $\delta$ , 8.29 (d,  $J = 13.6$  Hz, 1H), 7.71 (d,  $J = 8.4$  Hz, 2H), 7.32–7.23 (m, 6H), 5.93 (d,  $J = 0.8$  Hz, 1H), 5.05 (d,  $J = 13.6$  Hz, 1H), 4.99 (d,  $J = 0.8$  Hz, 1H), 4.17 (q,  $J = 7.2$  Hz, 2H), 2.44 (s, 3H), 1.26 (t,  $J = 7.2$  Hz, 3H).  $^{13}\text{C}$  NMR (100 MHz,  $\text{CDCl}_3$ ),  $\delta$ , 166.9, 145.2, 142.2, 140.7, 135.9, 134.9, 134.7, 130.0, 129.9, 129.3, 127.8, 125.8, 124.1, 118.9, 100.6, 60.2, 21.6, 14.2. IR (neat,  $\text{cm}^{-1}$ )  $\nu$  1708, 1621; HRMS (ESI) calcd for  $\text{C}_{20}\text{H}_{20}^{35}\text{ClNO}_4\text{S}$  ( $\text{M}+\text{H}^+$ ): 406.0874; Found: 406.0881.

**(E)-Ethyl 3-(N-(1-(3-bromophenyl)vinyl)-4-methylphenylsulfonamido)acrylate (3i)**

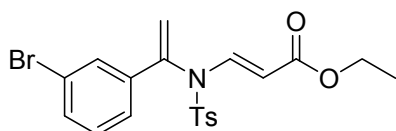

Pale yellow oil.  $^1\text{H}$  NMR (400 MHz,  $\text{CDCl}_3$ ):  $\delta$ , 8.28 (d,  $J = 13.6$  Hz, 1H), 7.69 (d,  $J = 8.4$  Hz, 2H), 7.39–7.37 (m, 2H), 7.34–7.28 (m, 3H), 7.17 (t,  $J = 8.0$  Hz, 1H), 5.92 (d,  $J = 0.8$  Hz, 1H), 5.04 (d,  $J = 13.6$  Hz, 1H), 4.98 (d,  $J = 0.8$  Hz, 1H), 4.16 (q,  $J = 7.2$  Hz, 2H), 2.41 (s, 3H), 1.25 (t,  $J = 7.2$  Hz, 3H).  $^{13}\text{C}$  NMR (100 MHz,  $\text{CDCl}_3$ ):  $\delta$ , 166.7, 145.1, 142.0, 140.4, 136.0, 134.7, 132.0, 130.0, 129.9, 128.5, 127.6, 124.4, 122.7, 119.0, 100.4, 60.2, 21.5, 14.1. IR (neat,  $\text{cm}^{-1}$ )  $\nu$  1707, 1621; HRMS (ESI) calcd for  $\text{C}_{20}\text{H}_{20}^{79}\text{BrNO}_4\text{S}$  ( $\text{M}+\text{H}^+$ ): 450.0369; Found: 450.0373.

**(E)-Ethyl 3-(4-methyl-N-(1-(naphthalen-2-yl)vinyl)phenylsulfonamido)acrylate (3j)**

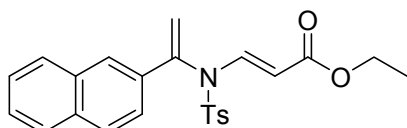

Yellow oil.  $^1\text{H}$  NMR (400 MHz,  $\text{CDCl}_3$ ):  $\delta$ , 8.40 (d,  $J = 13.6$  Hz, 1H), 7.79–7.69 (m, 6H), 7.39–7.37 (m, 2H), 7.57 (dd,  $J = 8.4, 1.6$  Hz, 1H), 7.49–7.46 (m, 2H), 7.28–7.26 (m, 2H), 6.06 (d,  $J = 0.8$  Hz, 1H), 5.13 (d,  $J = 13.6$  Hz, 1H), 5.04 (d,  $J = 0.8$  Hz, 1H), 4.16 (q,  $J = 7.2$  Hz, 2H), 2.39

(s, 3H), 1.25 (t,  $J = 7.2$  Hz, 3H).  $^{13}\text{C}$  NMR (100 MHz,  $\text{CDCl}_3$ ):  $\delta$ , 167.1, 144.9, 142.5, 141.9, 135.3, 133.5, 133.0, 131.0, 129.9, 128.6, 128.5, 127.9, 127.5, 126.8, 126.5, 125.6, 123.0, 117.9, 100.5, 60.1, 21.5, 14.2. IR (neat,  $\text{cm}^{-1}$ )  $\nu$  1706, 1619; HRMS (ESI) calcd for  $\text{C}_{24}\text{H}_{23}\text{NO}_4\text{S}$  ( $\text{M}+\text{H}$ ) $^+$ : 422.1420; Found: 422.1428.

**(E)-Ethyl 3-(N-(1-(4-acetoxyphenyl)vinyl)-4-methylphenylsulfonamido)acrylate (3k)**

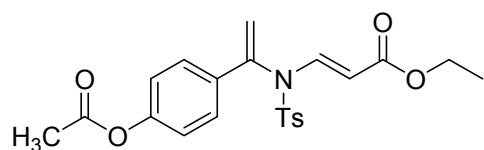

Yellow oil.  $^1\text{H}$  NMR (400 MHz,  $\text{CDCl}_3$ ):  $\delta$ , 8.29 (d,  $J = 13.6$  Hz, 1H), 7.72 (d,  $J = 8.0$  Hz, 2H), 7.41 (d,  $J = 8.8$  Hz, 2H), 7.31 (d,  $J = 8.0$  Hz, 2H), 7.04 (d,  $J = 8.8$  Hz, 2H), 5.87 (d,  $J = 0.8$  Hz, 1H), 5.07 (d,  $J = 13.6$  Hz, 1H), 4.89 (d,  $J = 0.8$  Hz, 1H), 4.17 (q,  $J = 7.2$  Hz, 2H), 2.43 (s, 3H), 2.29 (s, 3H), 1.26 (t,  $J = 7.2$  Hz, 3H).  $^{13}\text{C}$  NMR (100 MHz,  $\text{CDCl}_3$ ):  $\delta$ , 168.9, 166.9, 151.3, 145.0, 142.2, 135.0, 131.6, 129.9, 127.8, 127.8, 127.0, 121.7, 117.5, 100.5, 60.1, 21.5, 21.0, 14.2. IR (neat,  $\text{cm}^{-1}$ )  $\nu$  1763, 1708, 1621; HRMS (ESI) calcd for  $\text{C}_{22}\text{H}_{23}\text{NO}_6\text{S}$  ( $\text{M}+\text{H}$ ) $^+$ : 430.1318; Found: 430.1322.

**(E)-Ethyl 3-(4-chloro-N-(1-phenylvinyl)phenylsulfonamido)acrylate (3l)**

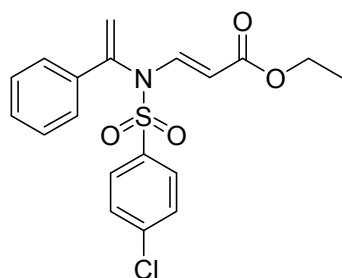

Pale yellow oil.  $^1\text{H}$  NMR (400 MHz,  $\text{CDCl}_3$ ):  $\delta$ , 8.28 (d,  $J = 13.6$  Hz, 1H), 7.77 (d,  $J = 8.4$  Hz, 2H), 7.48 (d,  $J = 8.4$  Hz, 2H), 7.39–7.37 (m, 2H), 7.33–7.27 (m, 3H), 5.95 (s, 1H), 5.14 (d,  $J = 13.6$  Hz, 1H), 4.93 (s, 1H), 4.17 (q,  $J = 7.2$  Hz, 2H), 1.26 (t,  $J = 7.2$  Hz, 3H).  $^{13}\text{C}$  NMR (100 MHz,  $\text{CDCl}_3$ ):  $\delta$ , 166.8, 141.9, 141.7, 140.4, 136.5, 133.6, 129.5, 129.3, 129.1, 128.6, 125.7, 117.6, 101.1, 60.1, 14.2. IR (neat,  $\text{cm}^{-1}$ )  $\nu$  1705, 1622; HRMS (ESI) calcd for  $\text{C}_{19}\text{H}_{18}^{35}\text{ClNO}_4\text{S}$  ( $\text{M}+\text{Na}$ ) $^+$ :

414.0537; Found: 414.0540.

**(E)-Ethyl 3-(4-bromo-N-(1-phenylvinyl)phenylsulfonamido)acrylate (3m)**

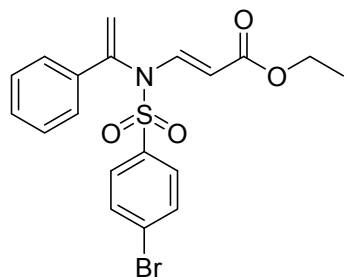

Pale yellow oil.  $^1\text{H}$  NMR (400 MHz,  $\text{CDCl}_3$ ):  $\delta$ , 8.27 (d,  $J = 13.6$  Hz, 1H), 7.69–7.62 (m, 4H), 7.38–7.28 (m, 4H), 5.94 (d,  $J = 0.8$  Hz, 1H), 5.14 (d,  $J = 13.6$  Hz, 1H), 4.92 (d,  $J = 0.8$  Hz, 1H), 4.16 (q,  $J = 7.2$  Hz, 2H), 1.26 (t,  $J = 7.2$  Hz, 3H).  $^{13}\text{C}$  NMR (100 MHz,  $\text{CDCl}_3$ ):  $\delta$ , 166.7, 141.9, 141.7, 137.0, 133.6, 132.5, 129.4, 129.2, 129.0, 128.6, 125.7, 117.6, 101.2, 60.1, 14.2. IR (neat,  $\text{cm}^{-1}$ )  $\nu$  1706, 1621; HRMS (ESI) calcd for  $\text{C}_{19}\text{H}_{18}^{79}\text{BrNO}_4\text{S}$  ( $\text{M}+\text{Na}$ ) $^+$ : 458.0032; Found: 458.0014.

**(E)-Ethyl 3-(4-nitro-N-(1-phenylvinyl)phenylsulfonamido)acrylate (3n)**

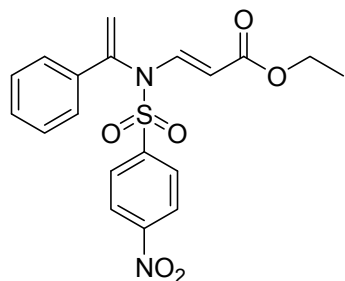

Pale yellow oil.  $^1\text{H}$  NMR (400 MHz,  $\text{CDCl}_3$ ):  $\delta$ , 8.33 (d,  $J = 8.8$  Hz, 2H), 8.28 (d,  $J = 13.6$  Hz, 1H), 8.00 (d,  $J = 8.8$  Hz, 2H), 7.35–7.28 (m, 4H), 5.97 (d,  $J = 0.8$  Hz, 1H), 5.22 (d,  $J = 13.6$  Hz, 1H), 4.96 (d,  $J = 0.8$  Hz, 1H), 4.18 (q,  $J = 7.2$  Hz, 2H), 1.27 (t,  $J = 7.2$  Hz, 3H).  $^{13}\text{C}$  NMR (100 MHz,  $\text{CDCl}_3$ ):  $\delta$ , 166.5, 150.5, 143.6, 141.6, 141.5, 133.4, 129.6, 129.1, 128.8, 125.8, 124.4, 118.1, 102.3, 60.4, 14.2. IR (neat,  $\text{cm}^{-1}$ )  $\nu$  1704, 1620; HRMS (ESI) calcd for  $\text{C}_{19}\text{H}_{18}\text{N}_2\text{O}_6\text{S}$  ( $\text{M}+\text{Na}$ ) $^+$ : 425.0777; Found: 425.0760.

**(E)-Methyl 3-(4-methyl-N-(1-phenylvinyl)phenylsulfonamido)acrylate (3o)**

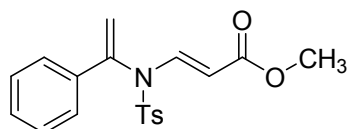

Pale yellow oil.  $^1\text{H}$  NMR (400 MHz,  $\text{CDCl}_3$ ):  $\delta$ , 8.32 (d,  $J = 13.6$  Hz, 1H), 7.74 (d,  $J = 8.0$  Hz, 2H), 7.41–7.38 (m, 2H), 7.32–7.27 (m, 5H), 5.91 (s, 1H), 5.08 (d,  $J = 13.6$  Hz, 1H), 4.89 (s, 1H), 3.68 (s, 3H), 2.44 (s, 3H).  $^{13}\text{C}$  NMR (100 MHz,  $\text{CDCl}_3$ ):  $\delta$ , 167.4, 144.9, 142.6, 141.9, 135.2, 133.9, 129.9, 129.2, 128.6, 127.8, 125.7, 117.3, 100.0, 51.2, 21.5. IR (neat,  $\text{cm}^{-1}$ )  $\nu$  1715, 1621; HRMS (ESI) calcd for  $\text{C}_{19}\text{H}_{19}\text{NO}_4\text{S}$  ( $\text{M}+\text{H}$ ) $^+$ : 358.1107; Found: 358.1105.

**(E)-Benzyl 3-(4-methyl-N-(1-phenylvinyl)phenylsulfonamido)acrylate (3p)**

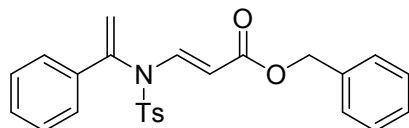

Pale yellow oil.  $^1\text{H}$  NMR (400 MHz,  $\text{CDCl}_3$ ):  $\delta$ , 8.36 (d,  $J = 13.6$  Hz, 1H), 7.74 (d,  $J = 8.0$  Hz, 2H), 7.41–7.30 (m, 12H), 5.91 (s, 1H), 5.13 (s, 2H), 5.13 (d,  $J = 13.6$  Hz, 1H), 4.89 (s, 1H), 2.44 (s, 3H).  $^{13}\text{C}$  NMR (100 MHz,  $\text{CDCl}_3$ ):  $\delta$ , 166.9, 144.9, 142.9, 141.9, 136.1, 135.2, 133.9, 129.9, 129.3, 128.6, 128.5, 128.2, 128.1, 127.9, 125.8, 117.3, 100.0, 65.9, 21.6. IR (neat,  $\text{cm}^{-1}$ )  $\nu$  1706, 1621; HRMS (ESI) calcd for  $\text{C}_{25}\text{H}_{23}\text{NO}_4\text{S}$  ( $\text{M}+\text{H}$ ) $^+$ : 434.1420; Found: 434.1413.

**(E)-4-Methylbenzyl 3-(4-methyl-N-(1-phenylvinyl)phenylsulfonamido)acrylate (3q)**

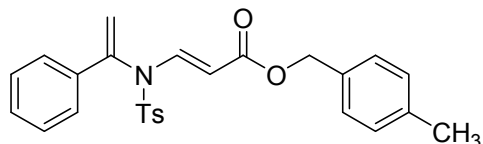

Pale yellow oil.  $^1\text{H}$  NMR (400 MHz,  $\text{CDCl}_3$ ):  $\delta$ , 8.36 (d,  $J = 13.6$  Hz, 1H), 7.74 (d,  $J = 8.0$  Hz, 2H), 7.42–7.39 (m, 2H), 7.33–7.27 (m, 5H), 7.26 (d,  $J = 8.0$  Hz, 2H), 7.17 (d,  $J = 8.0$  Hz, 2H), 5.91 (s, 1H), 5.13 (d,  $J = 13.6$  Hz, 1H), 5.10 (s, 2H), 4.89 (s, 1H), 2.44 (s, 3H), 2.35 (s, 3H).  $^{13}\text{C}$  NMR (100 MHz,  $\text{CDCl}_3$ ):  $\delta$ , 166.9, 144.9, 142.9, 138.0, 133.9, 133.1, 129.9, 129.3, 129.2, 128.6, 128.4, 127.9, 127.9, 126.5, 125.8, 117.3, 100.1, 65.9, 21.6, 21.1. IR (neat,  $\text{cm}^{-1}$ )  $\nu$  1708, 1621; HRMS (ESI) calcd for  $\text{C}_{26}\text{H}_{25}\text{NO}_4\text{S}$  ( $\text{M}+\text{H}$ ) $^+$ : 448.1577; Found: 448.1578.

**(E)-4-Chlorobenzyl 3-(4-methyl-N-(1-phenylvinyl)phenylsulfonamido)acrylate (3r)**

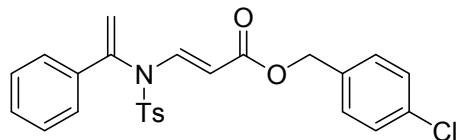

Pale yellow oil.  $^1\text{H}$  NMR (400 MHz,  $\text{CDCl}_3$ ):  $\delta$ , 8.36 (d,  $J = 13.6$  Hz, 1H), 7.73 (d,  $J = 8.0$  Hz, 2H), 7.41–7.27 (m, 11H), 5.91 (s, 1H), 5.11 (d,  $J = 13.6$  Hz, 1H), 5.09 (s, 2H), 4.89 (s, 1H), 2.44 (s, 3H).  $^{13}\text{C}$  NMR (100 MHz,  $\text{CDCl}_3$ ):  $\delta$ , 166.8, 145.0, 143.1, 141.9, 134.7, 129.9, 129.7, 129.6, 129.3, 128.6, 128.5, 127.9, 127.9, 126.5, 125.8, 117.4, 99.6, 65.1, 21.6. IR (neat,  $\text{cm}^{-1}$ )  $\nu$  1712, 1620; HRMS (ESI) calcd for  $\text{C}_{25}\text{H}_{22}^{35}\text{ClNO}_4\text{S}$  ( $\text{M}+\text{H}$ ) $^+$ : 468.1030; Found: 468.1014.

**Dimethyl 2-(4-methyl-N-(1-phenylvinyl)phenylsulfonamido)maleate (3s)**

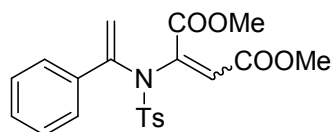

Pale yellow oil.  $^1\text{H}$  NMR (400 MHz,  $\text{CDCl}_3$ ):  $\delta$ , 7.86 (d,  $J = 13.6$  Hz, 2H), 7.53–7.50 (m, 2H), 7.32–7.27 (m, 5H), 5.89 (s, 1H), 5.56 (m, 1H), 5.13 (s, 1H), 3.98 (s, 3H), 3.62 (s, 3H), 2.43 (s, 3H).  $^{13}\text{C}$  NMR (100 MHz,  $\text{CDCl}_3$ ):  $\delta$ , 165.3, 164.2, 145.1, 145.0, 142.9, 135.1, 134.1, 129.7, 129.3, 128.6, 128.5, 126.0, 117.2, 106.9, 53.2, 51.7, 21.6. IR (neat,  $\text{cm}^{-1}$ )  $\nu$  1746, 1717, 1602; HRMS (ESI) calcd for  $\text{C}_{21}\text{H}_{21}\text{NO}_6\text{S}$  ( $\text{M}+\text{H}$ ) $^+$ : 416.1162; Found: 416.1167.

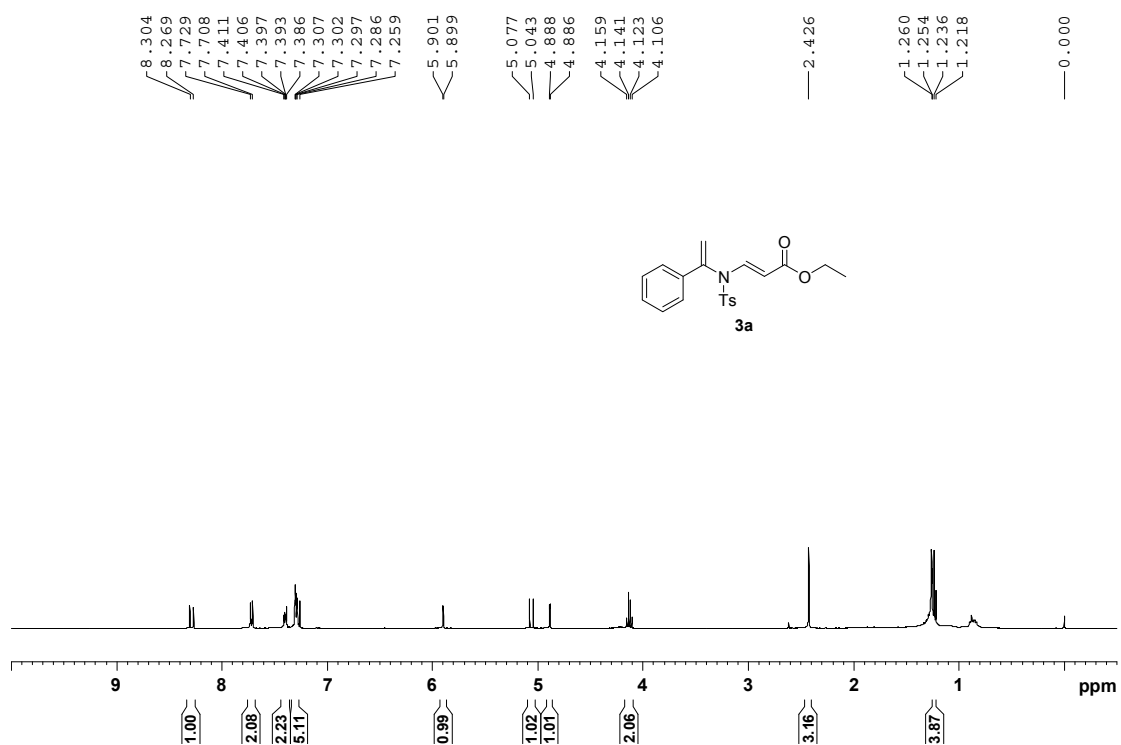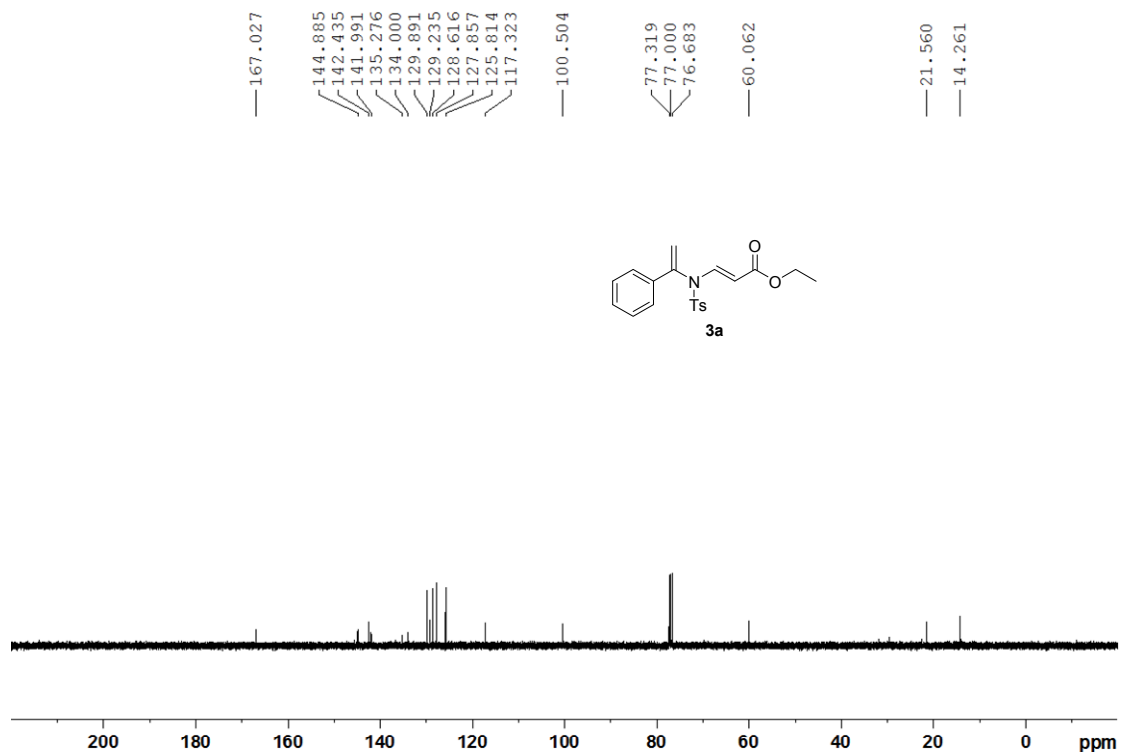

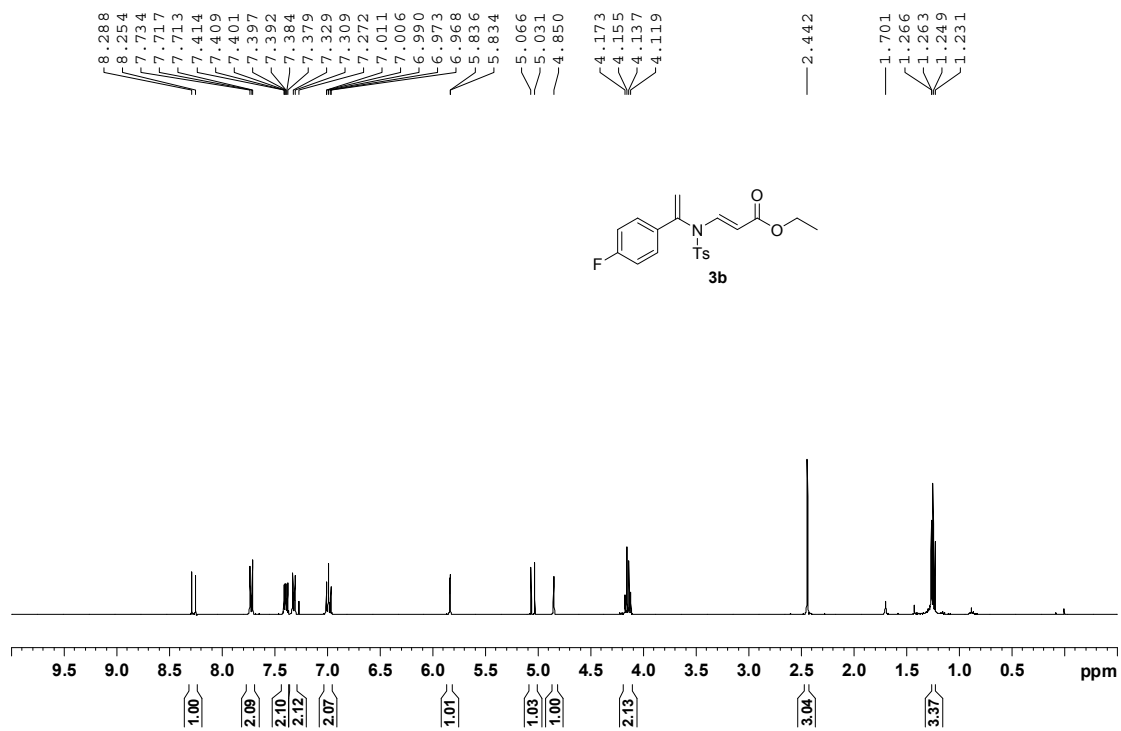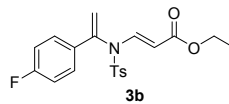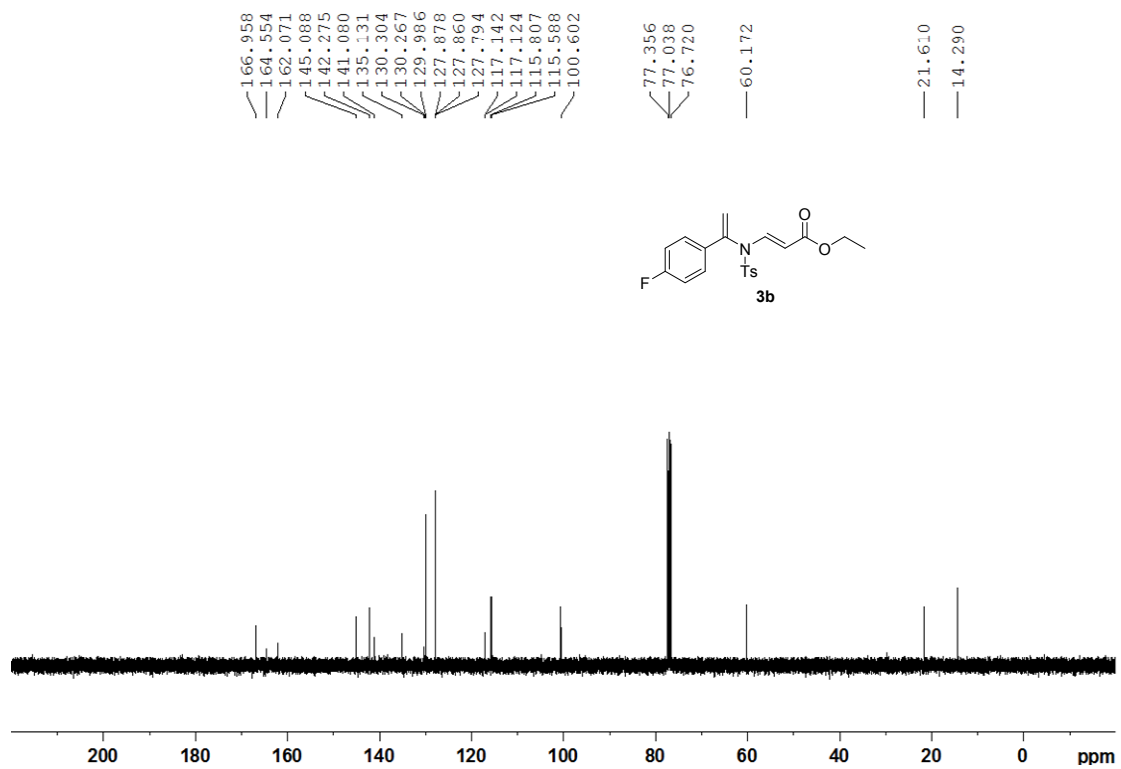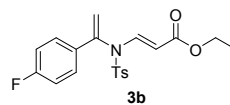

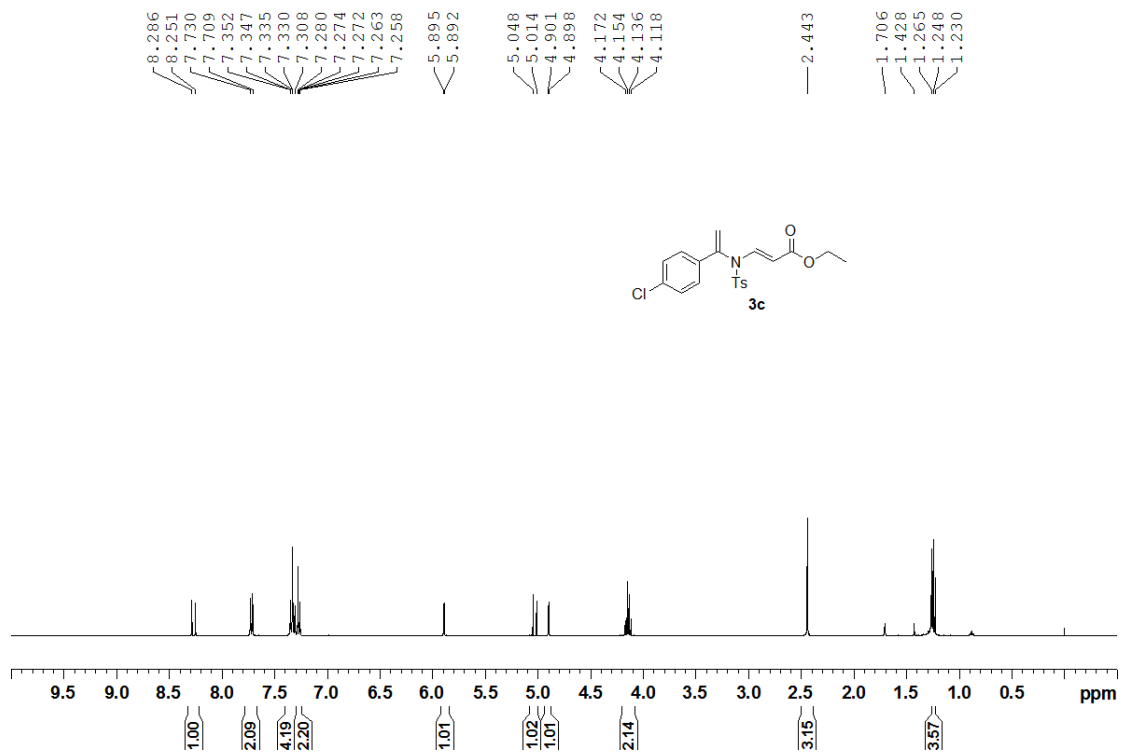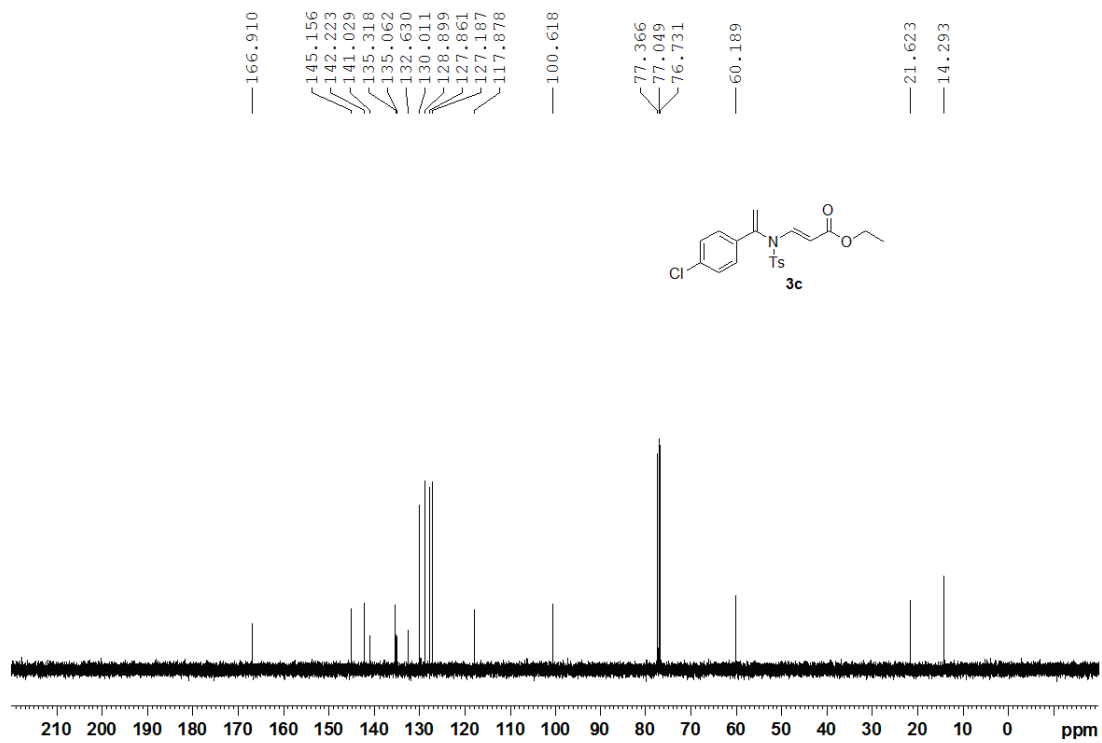



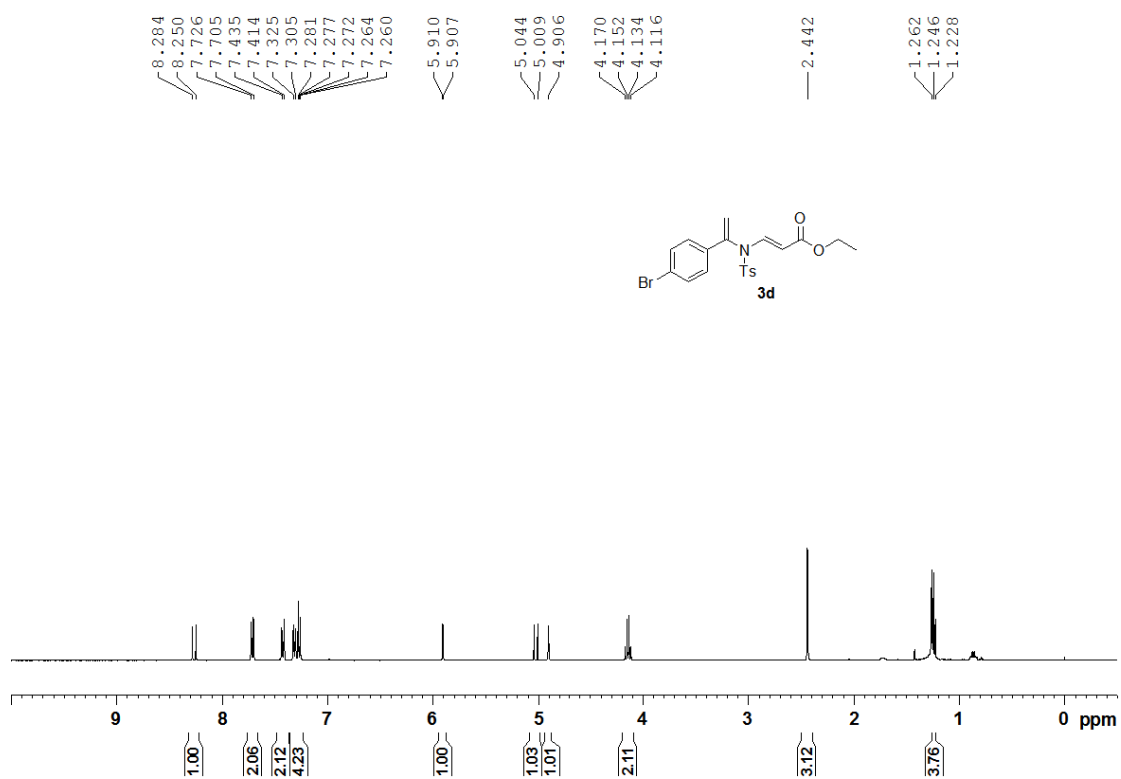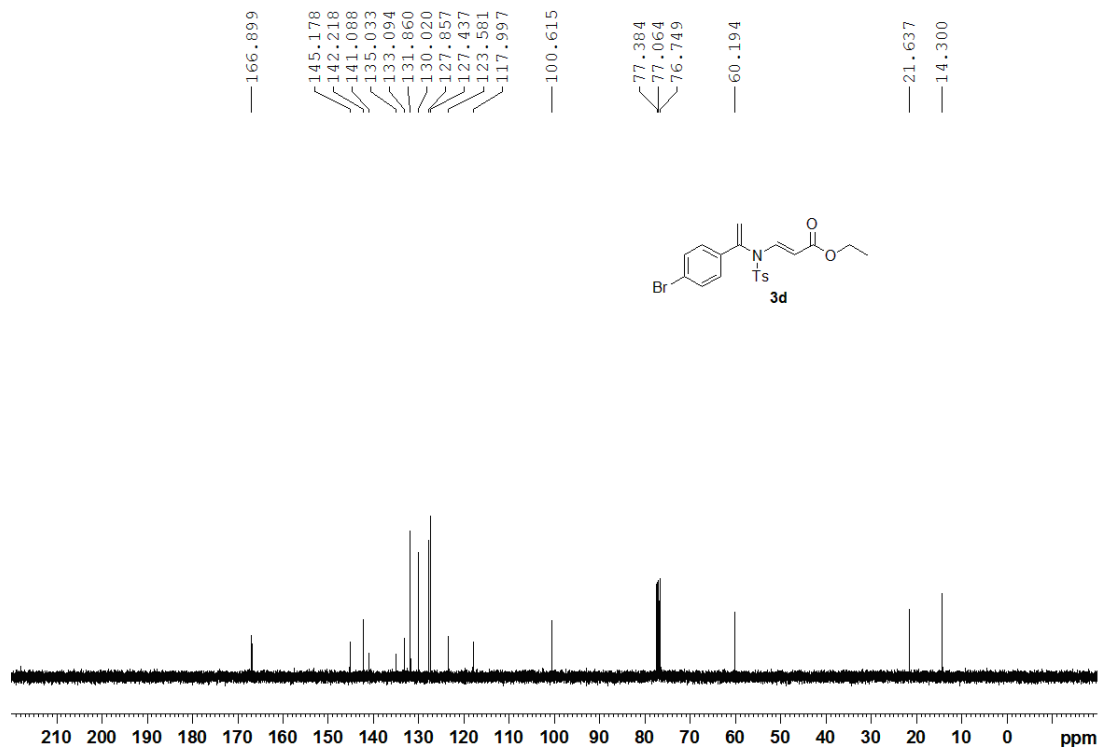

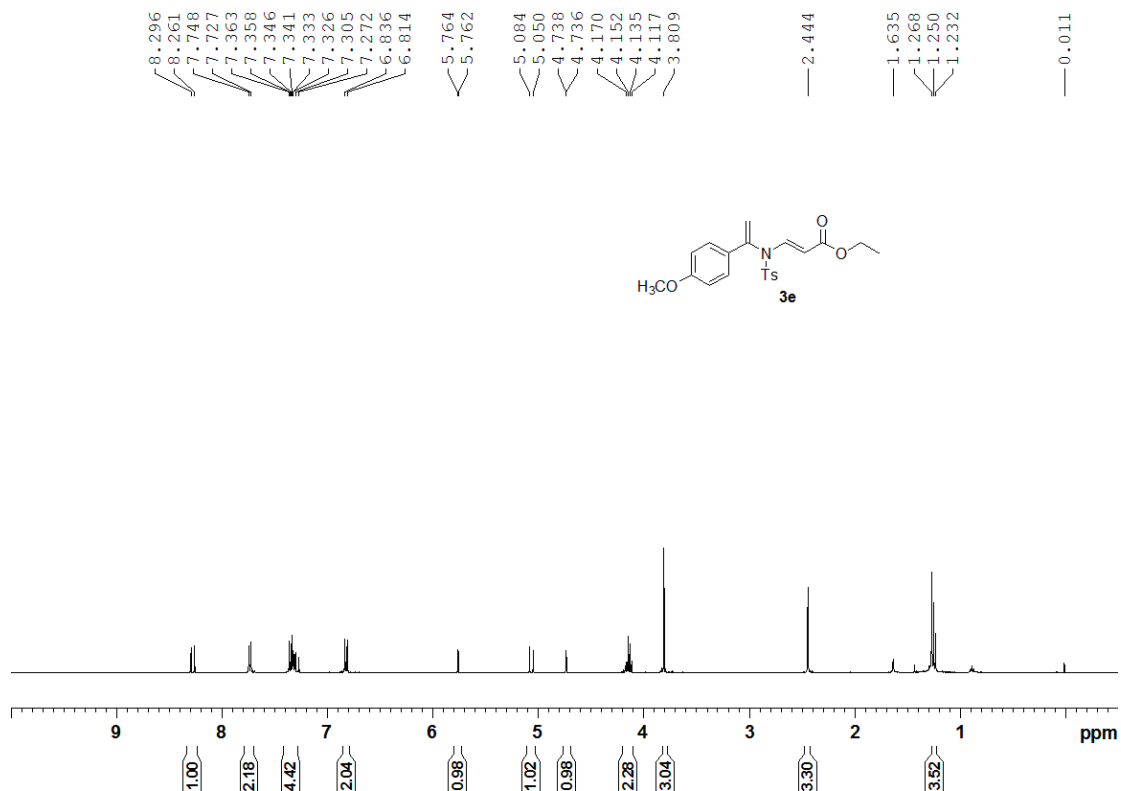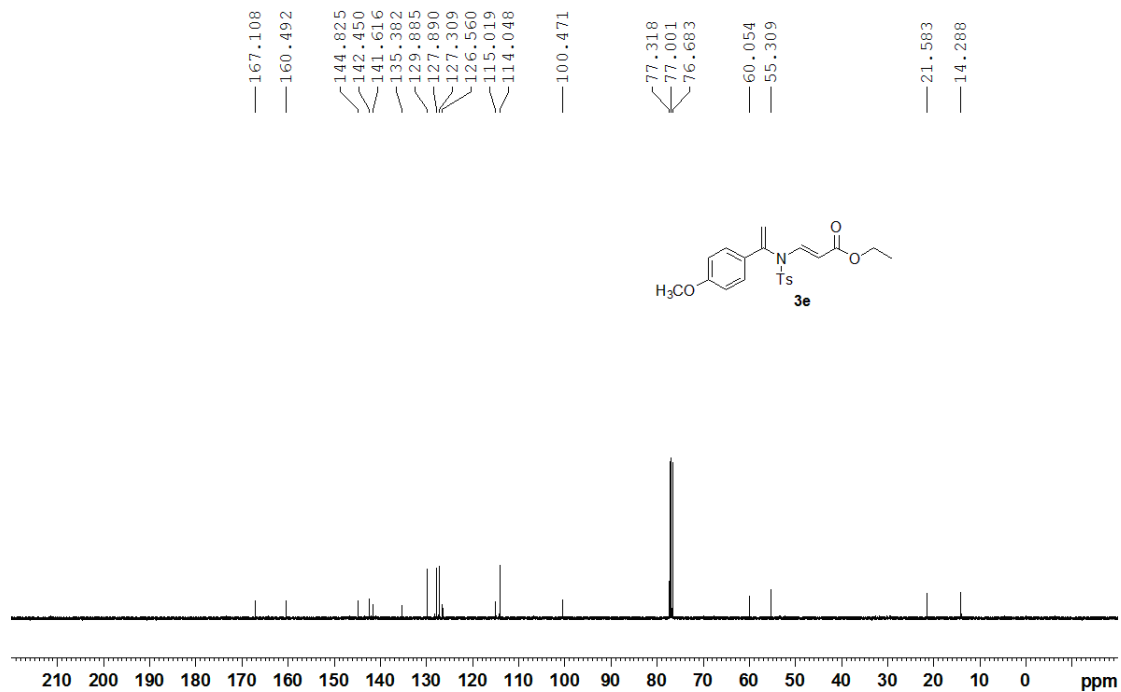

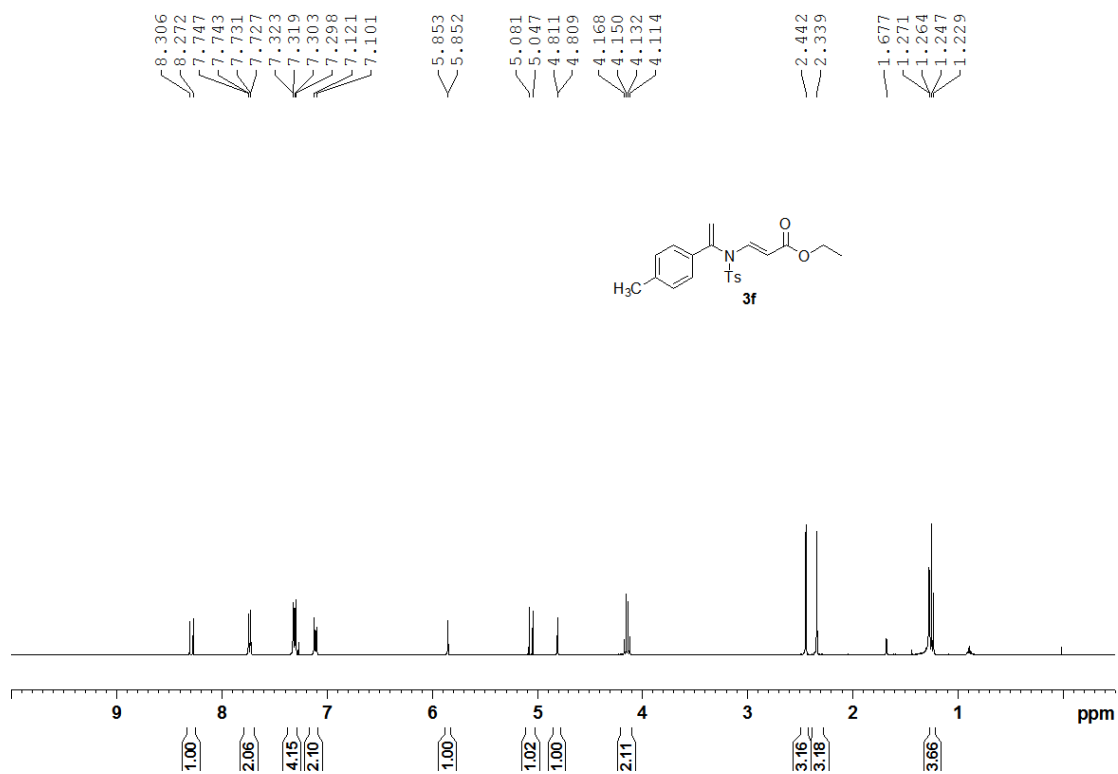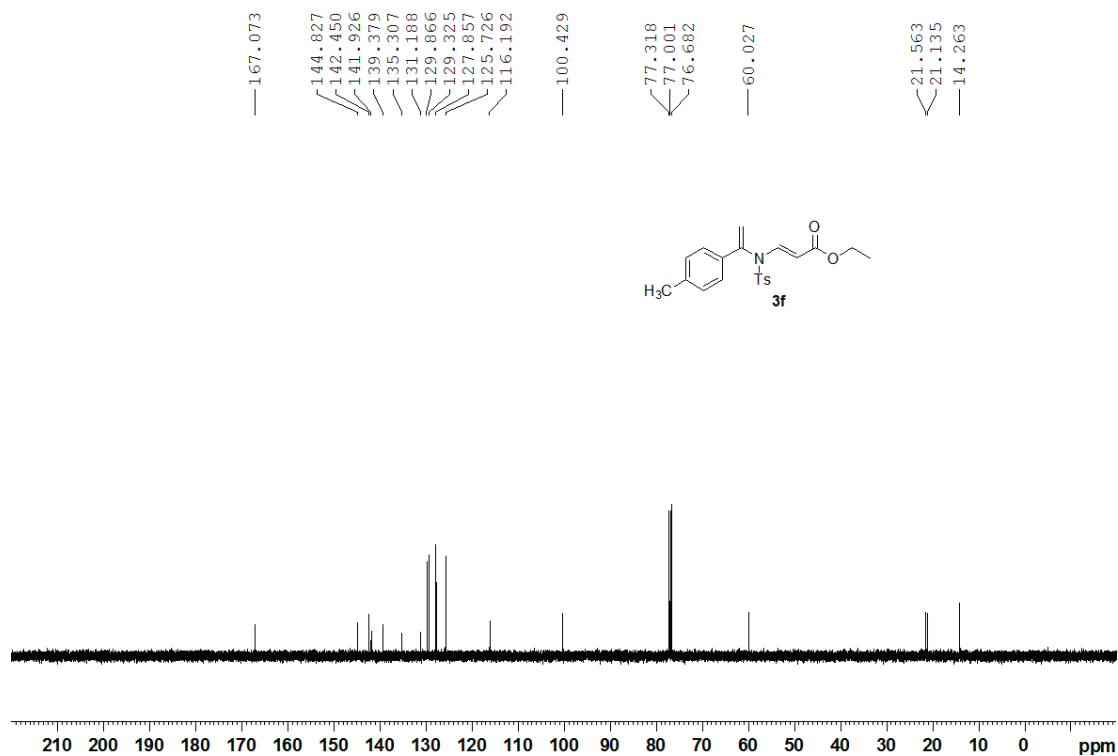

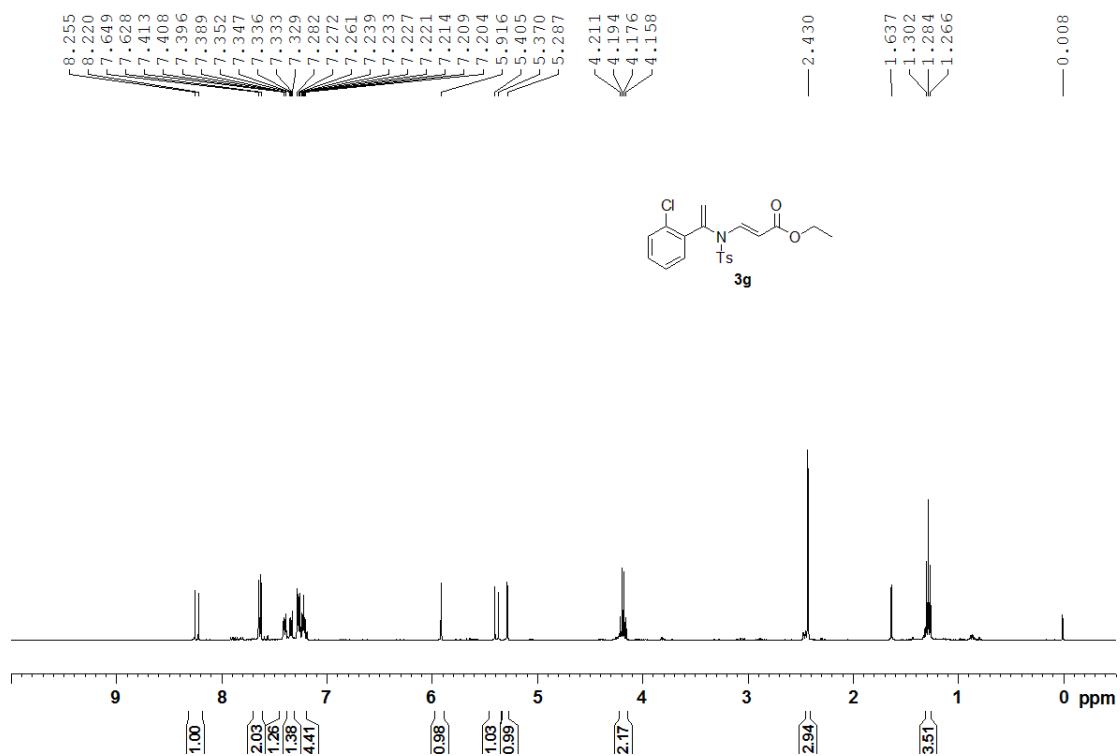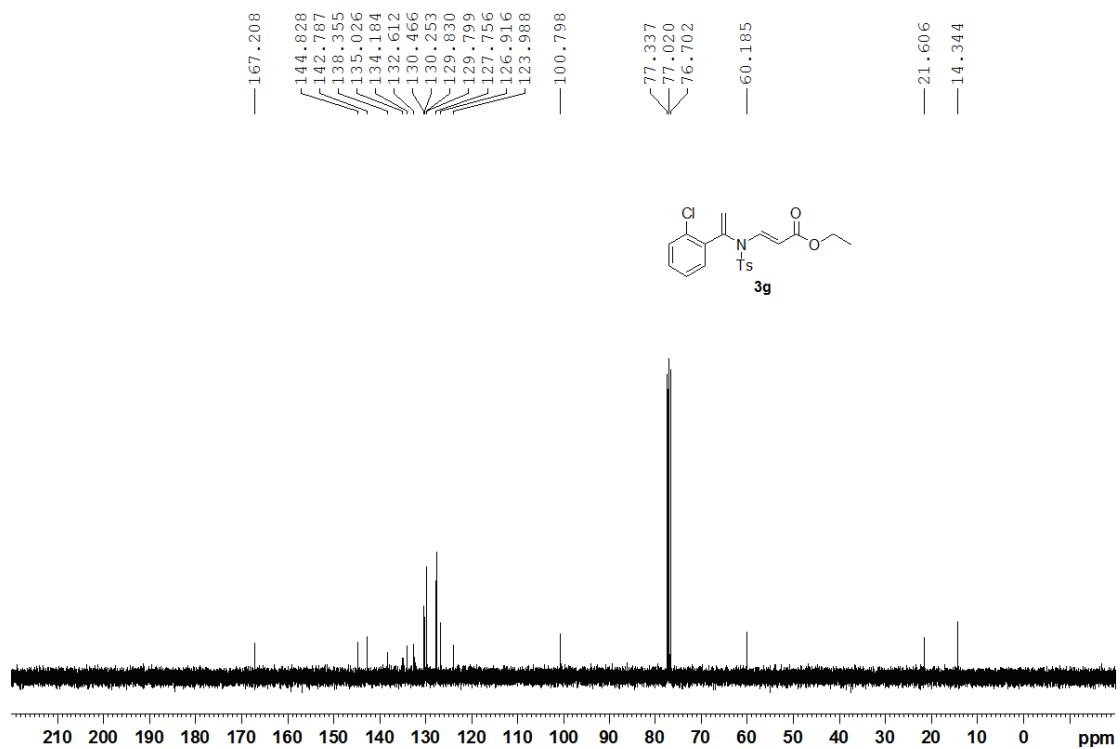

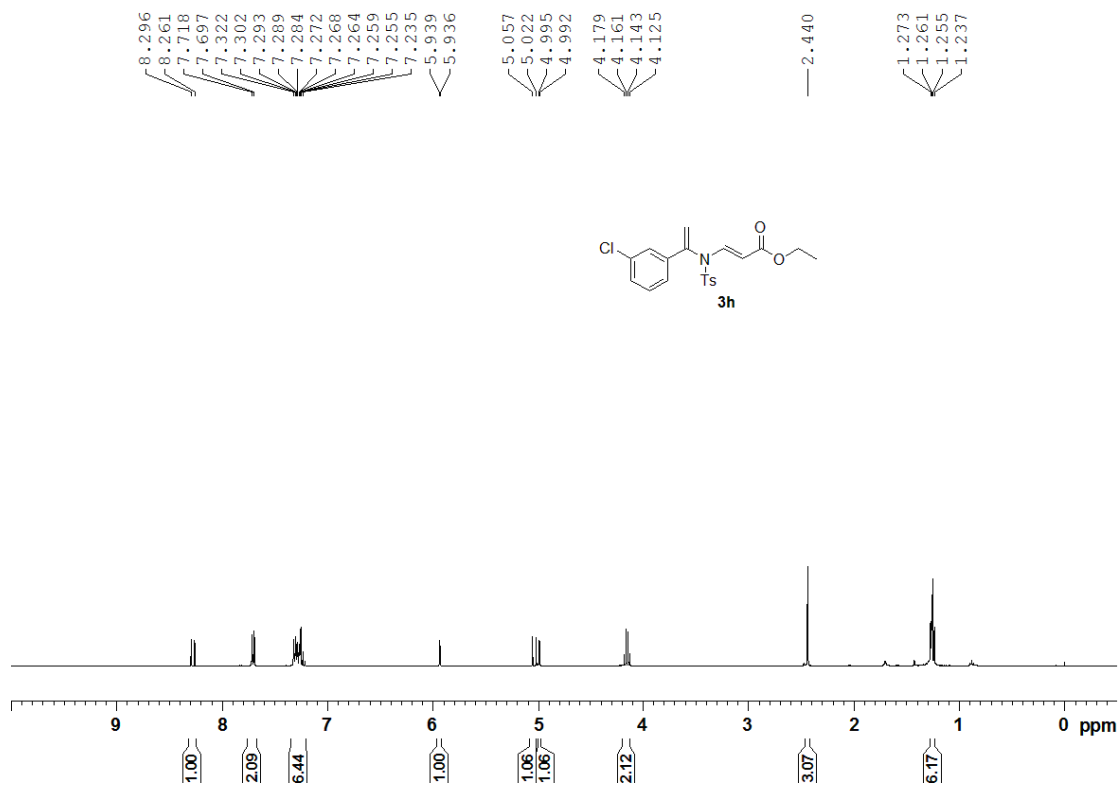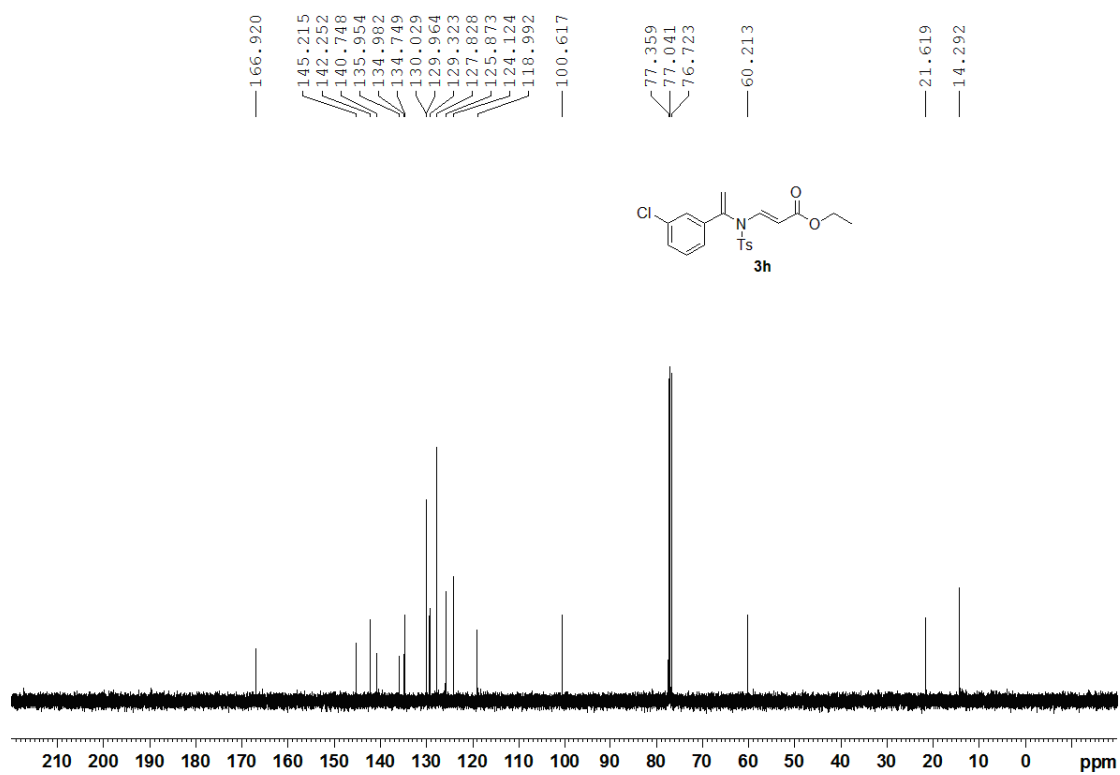

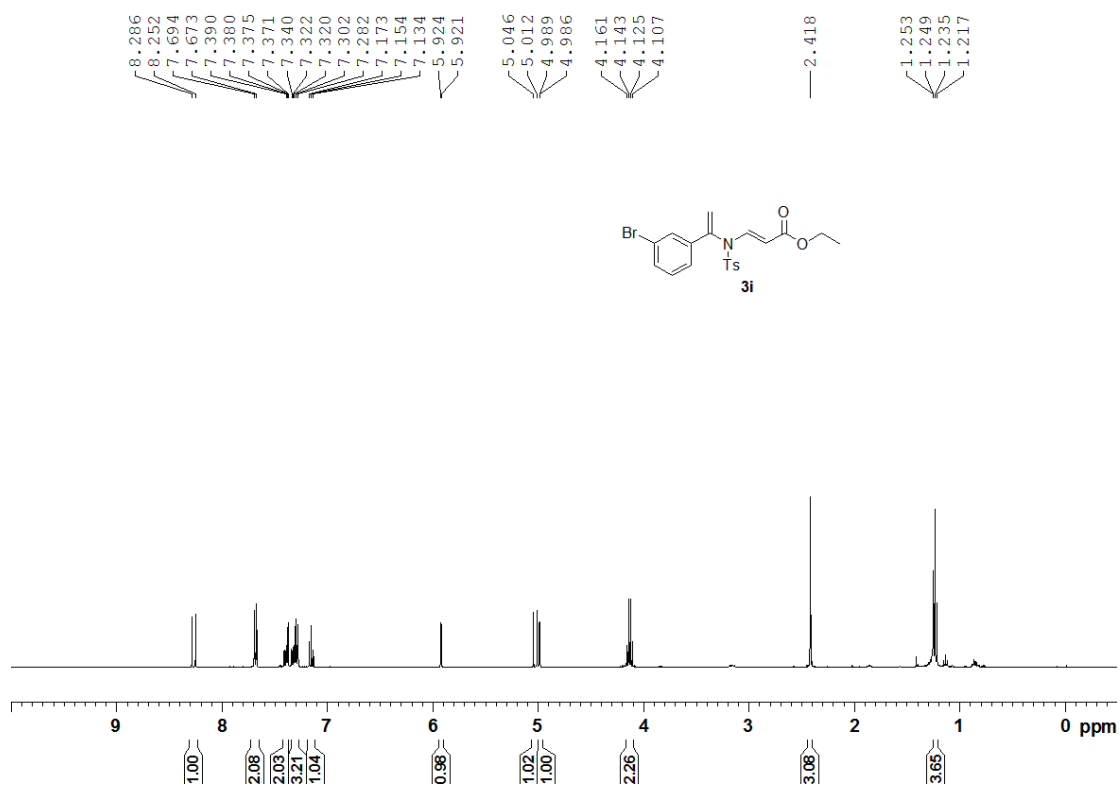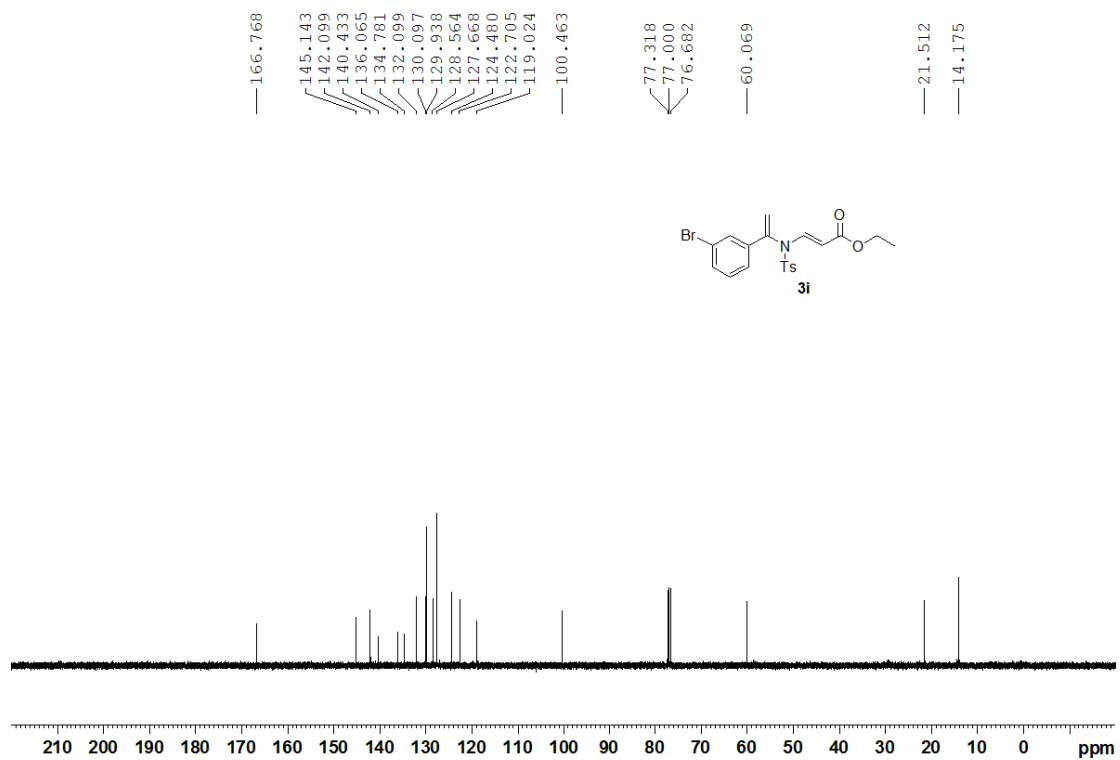

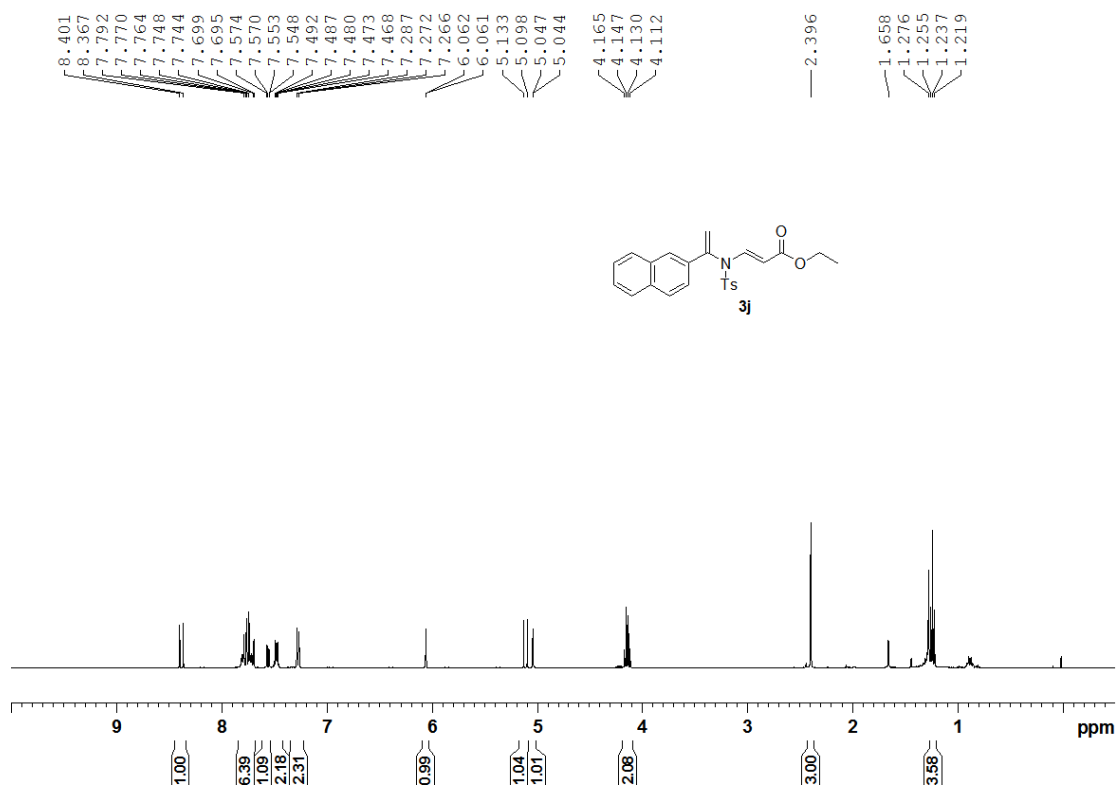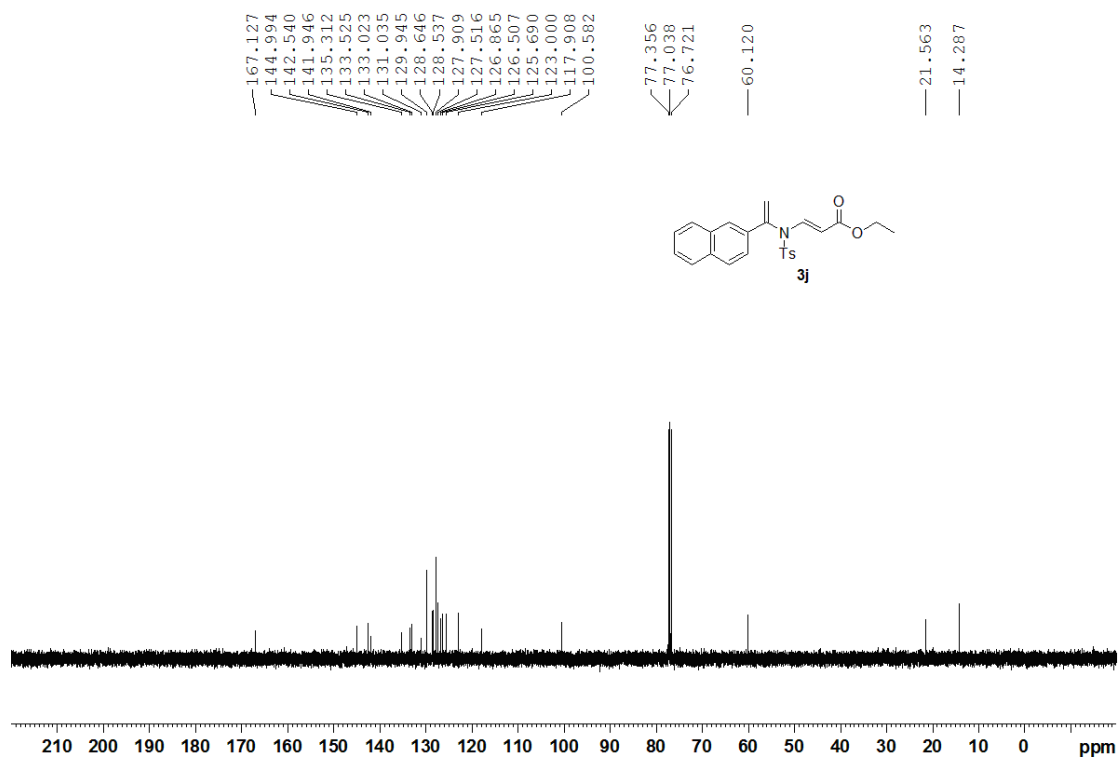

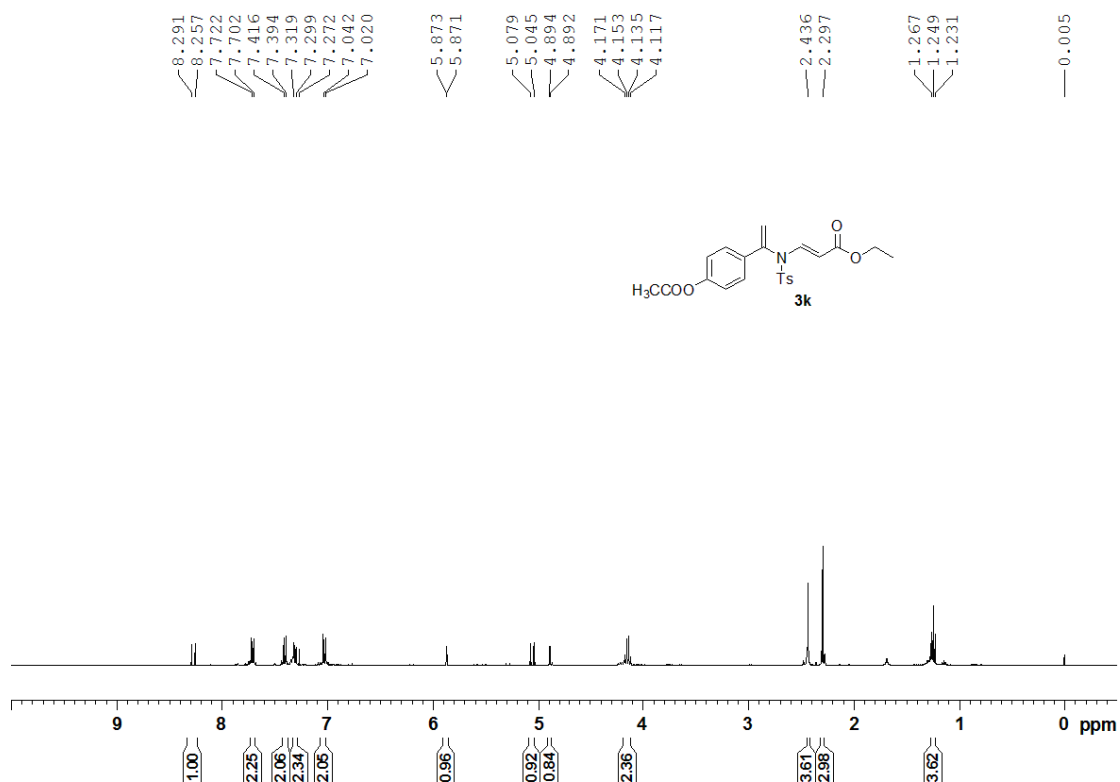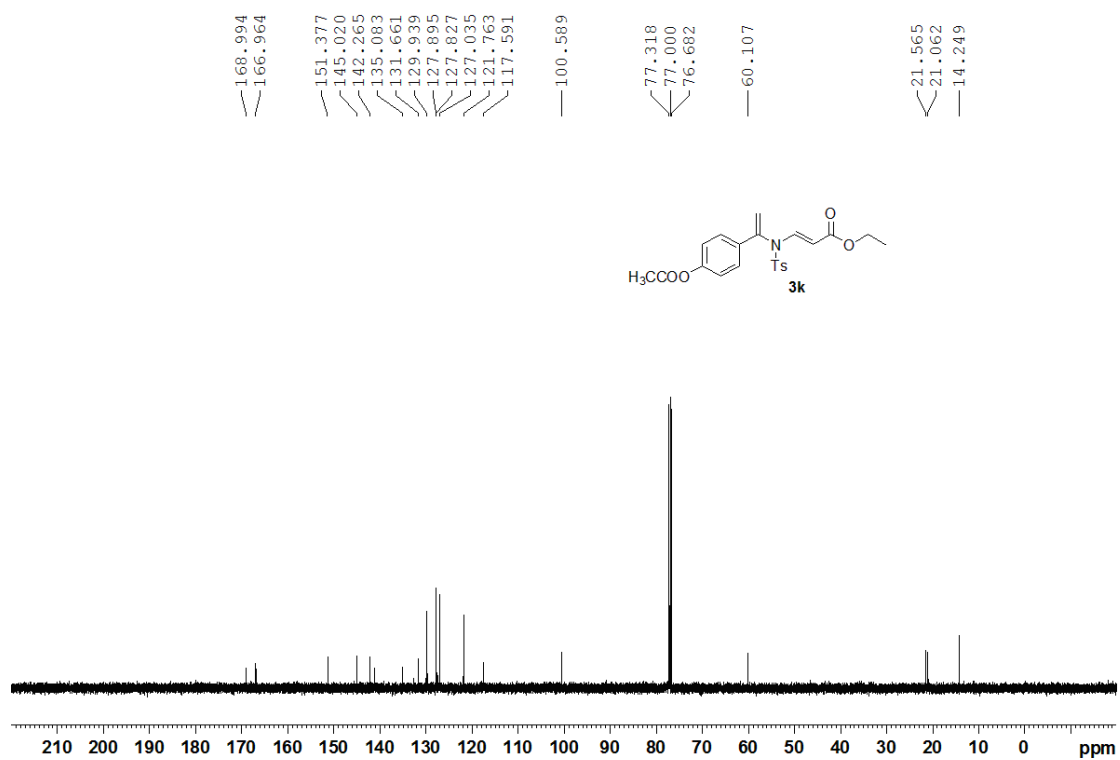



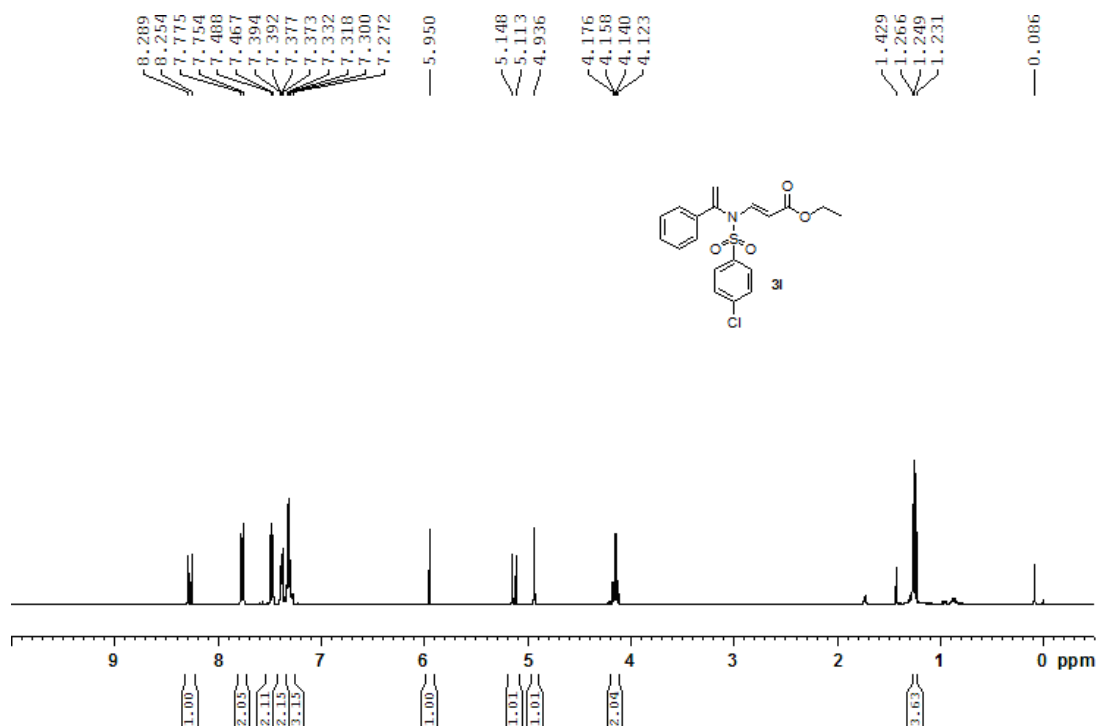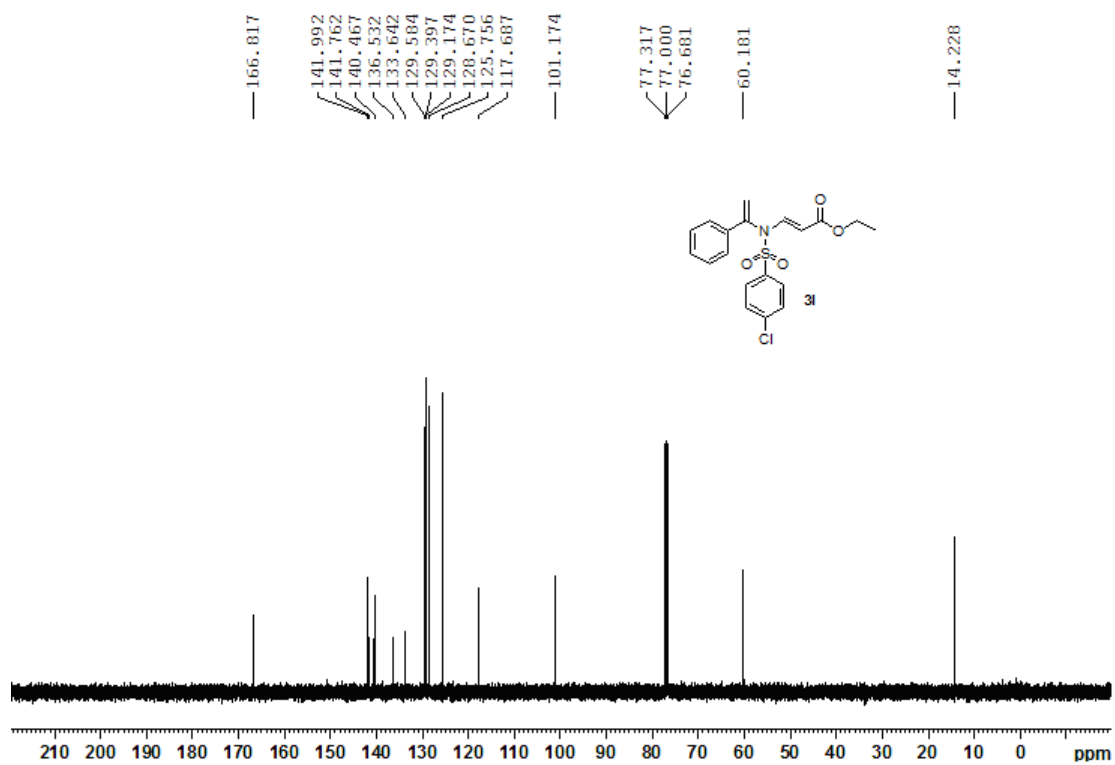

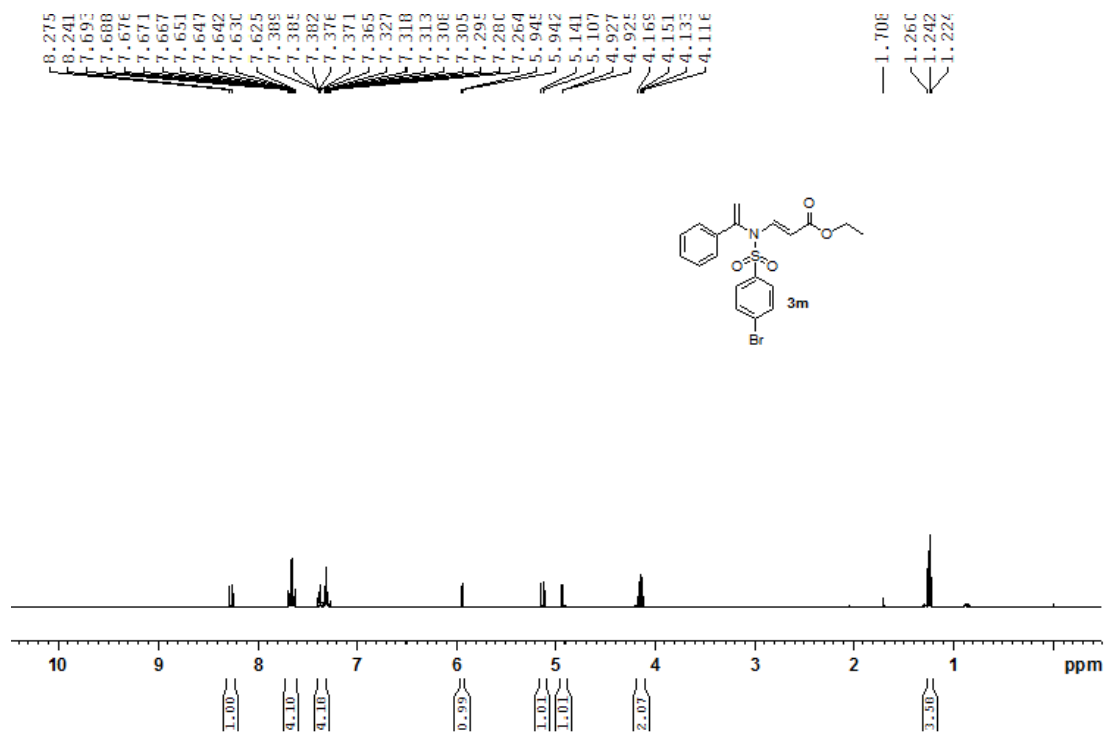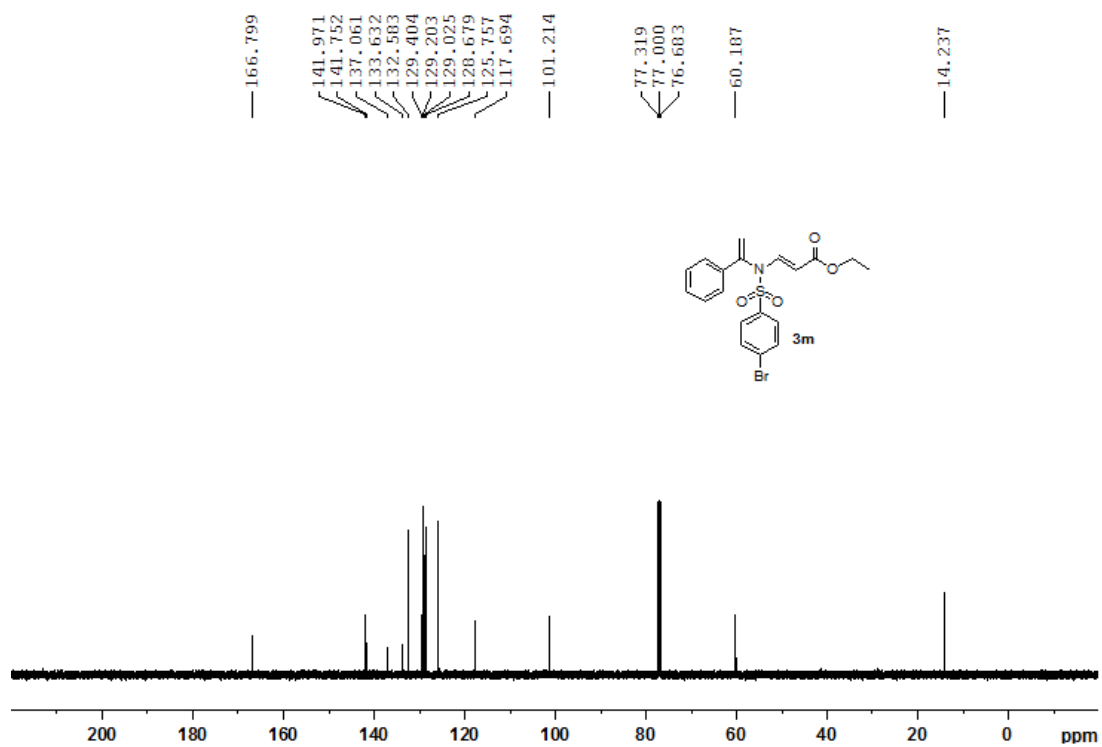

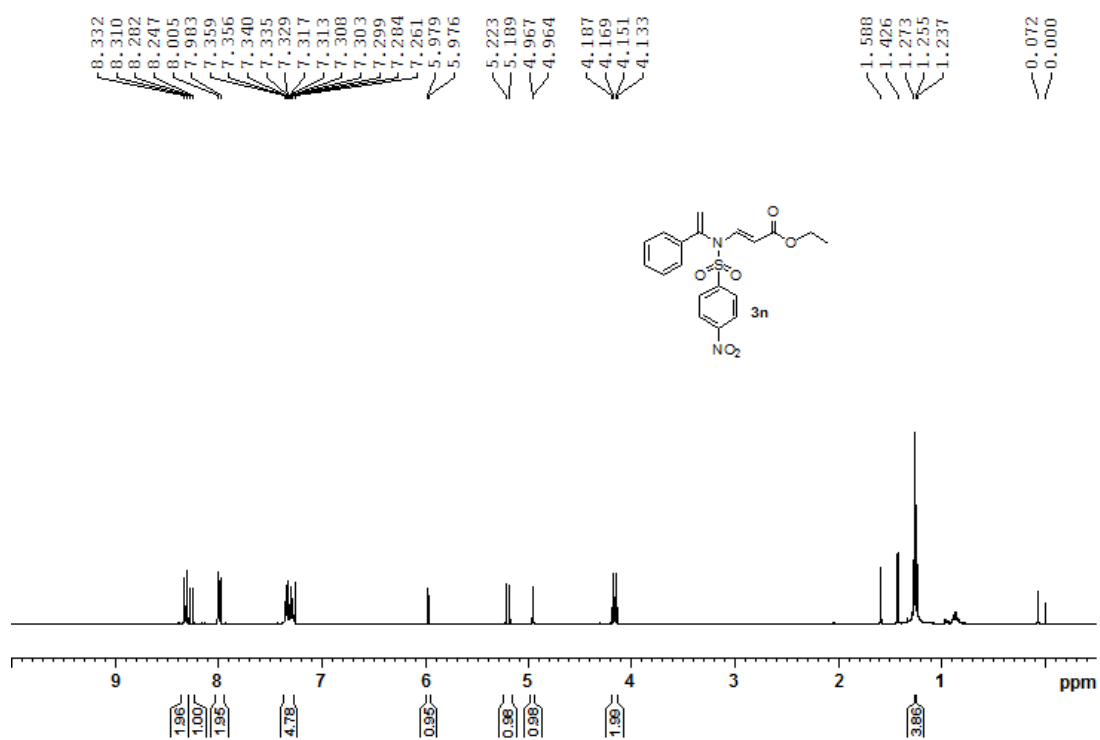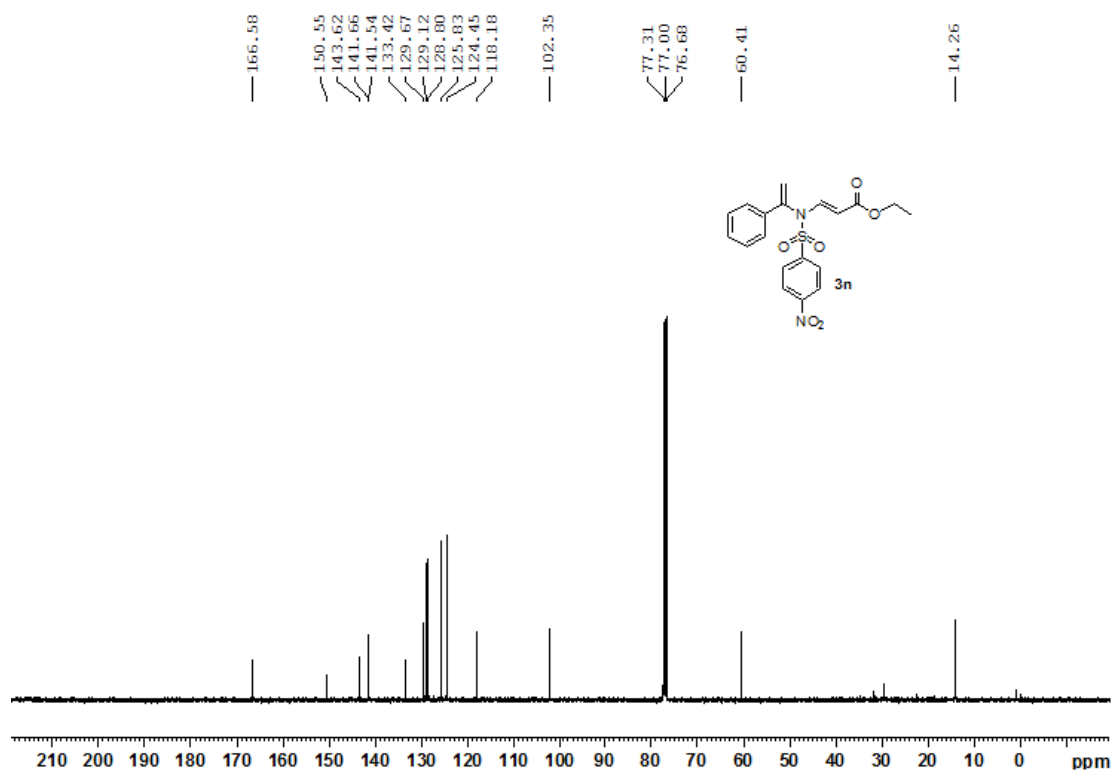

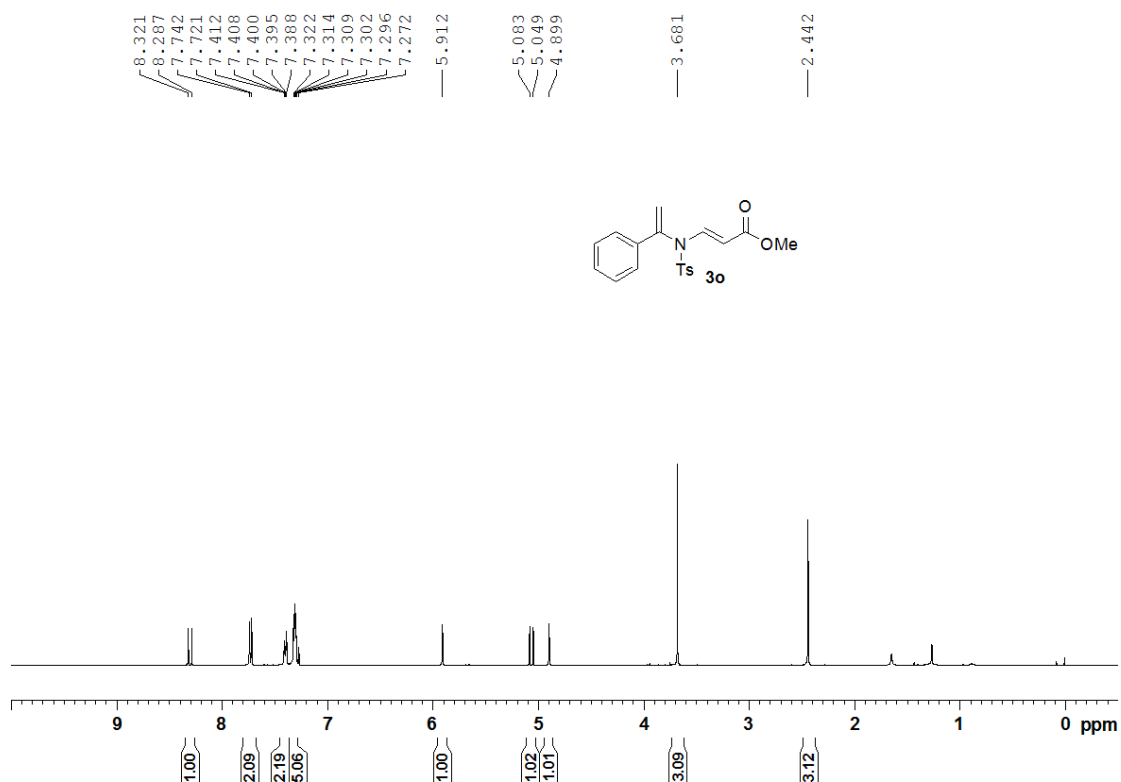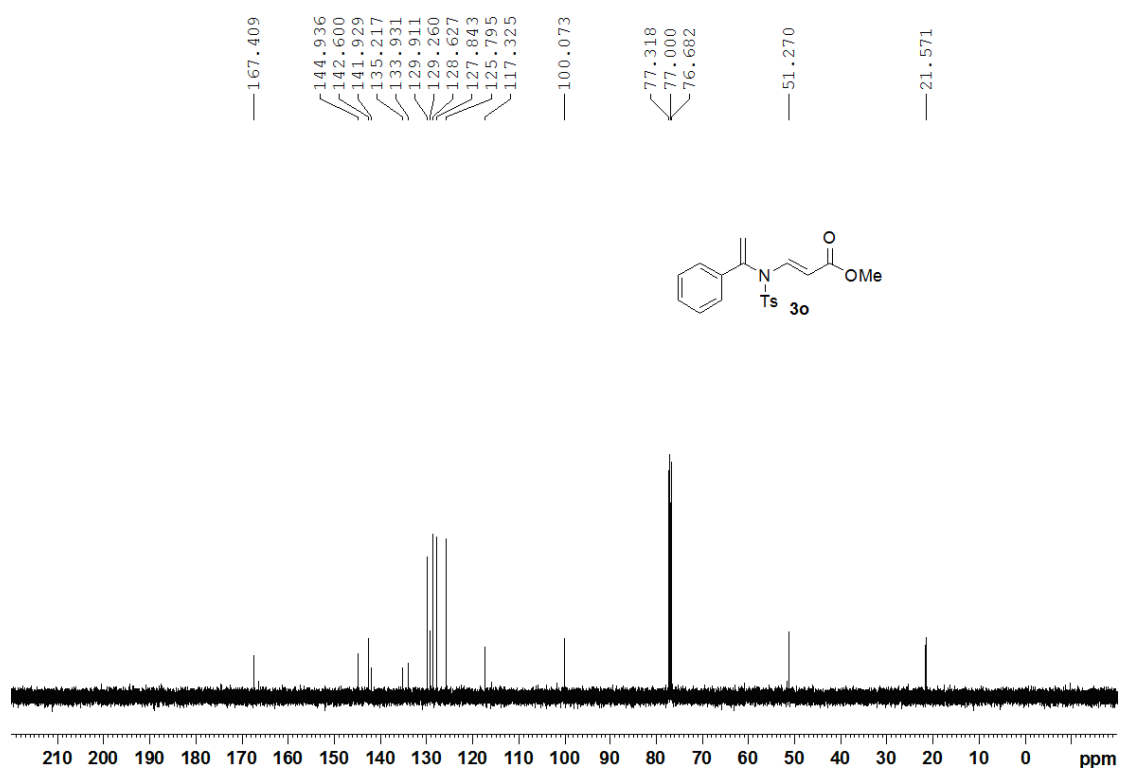

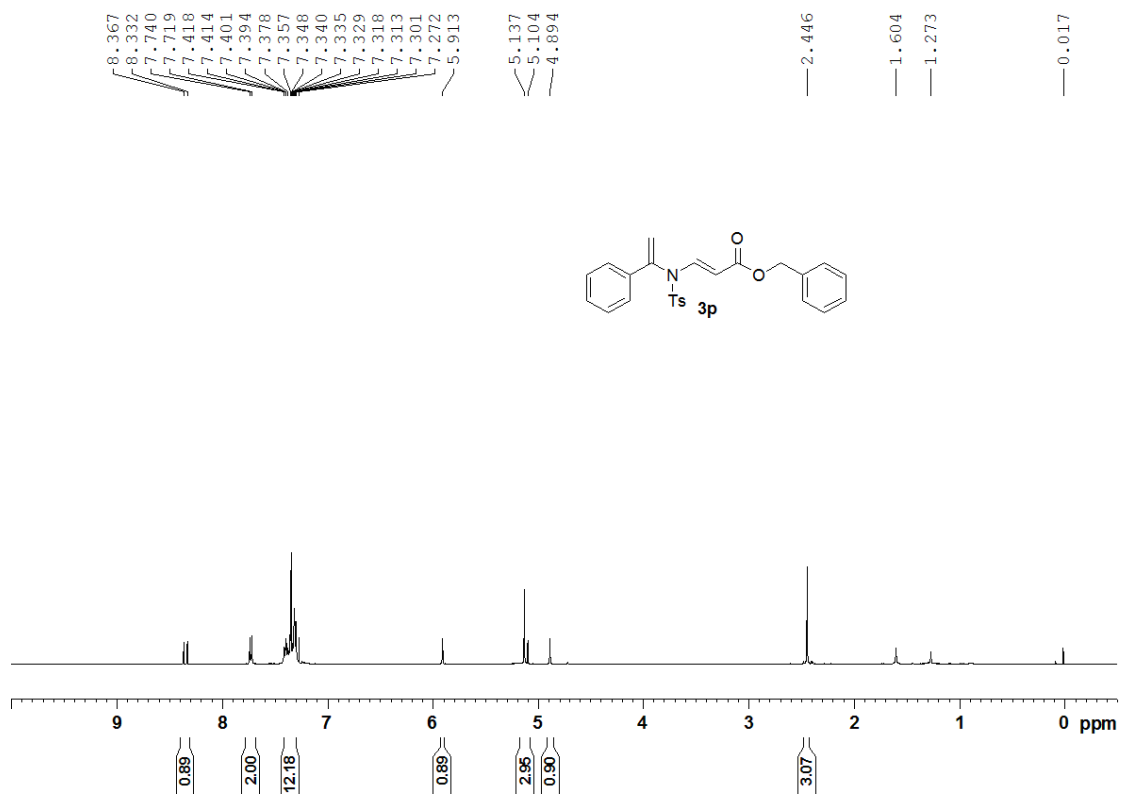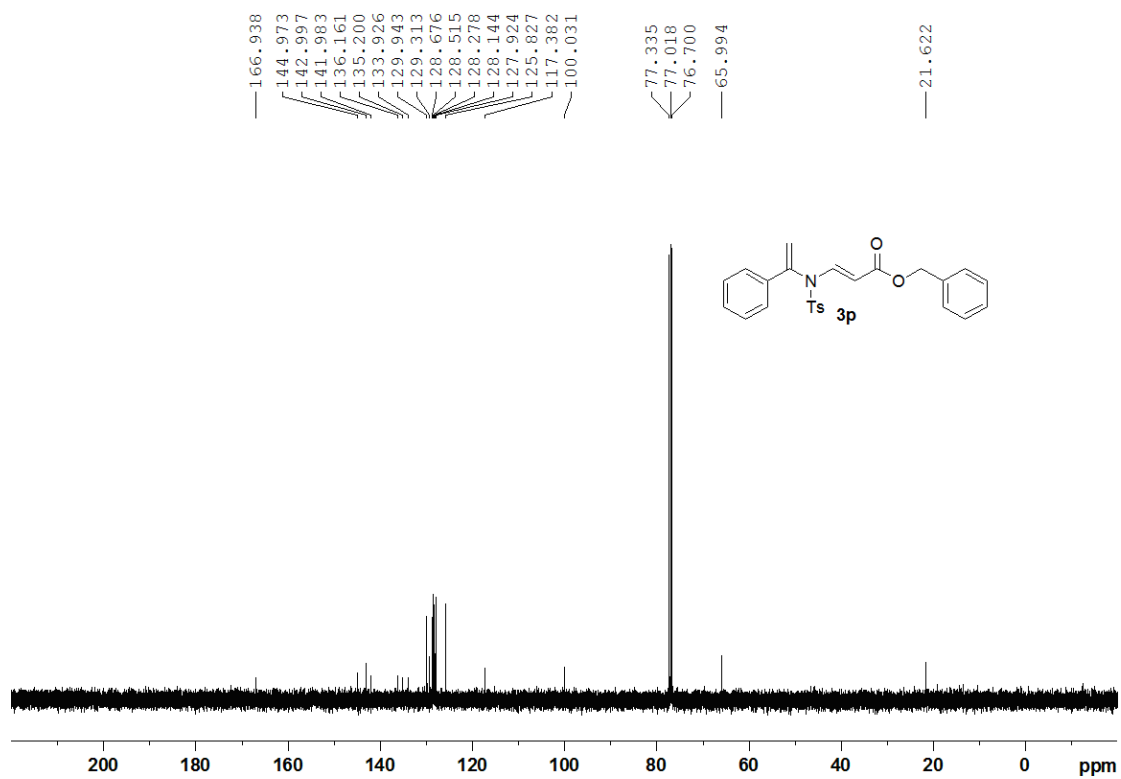

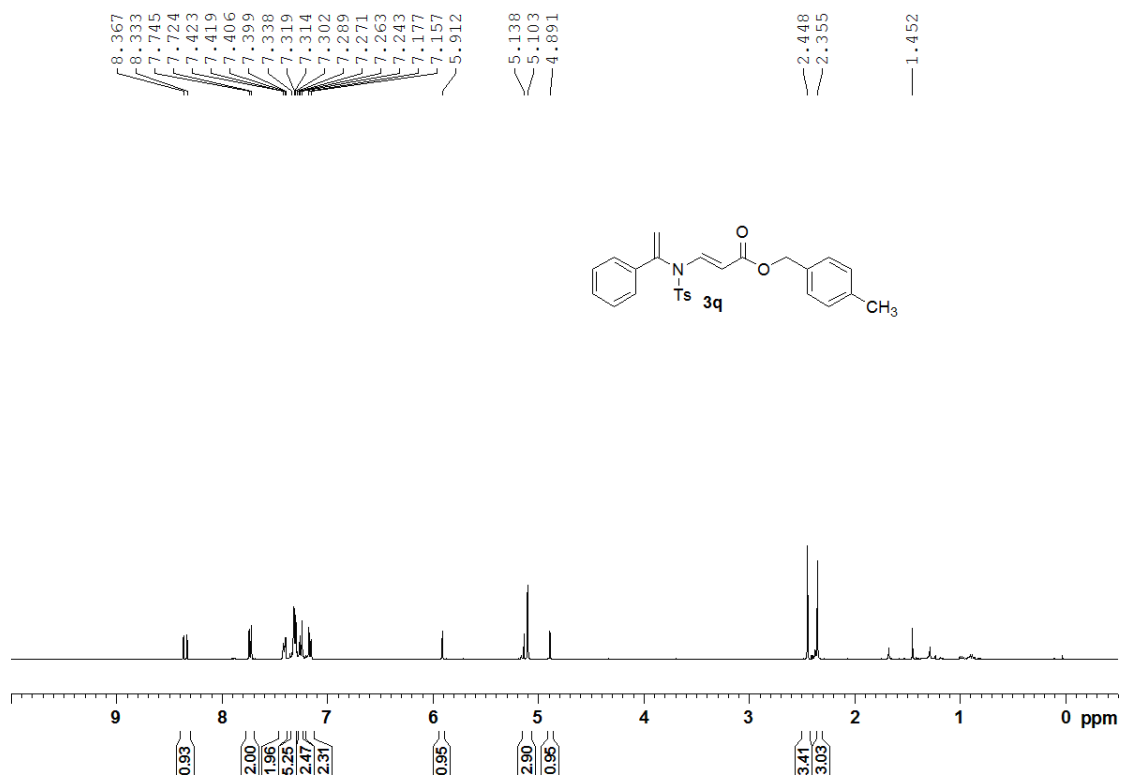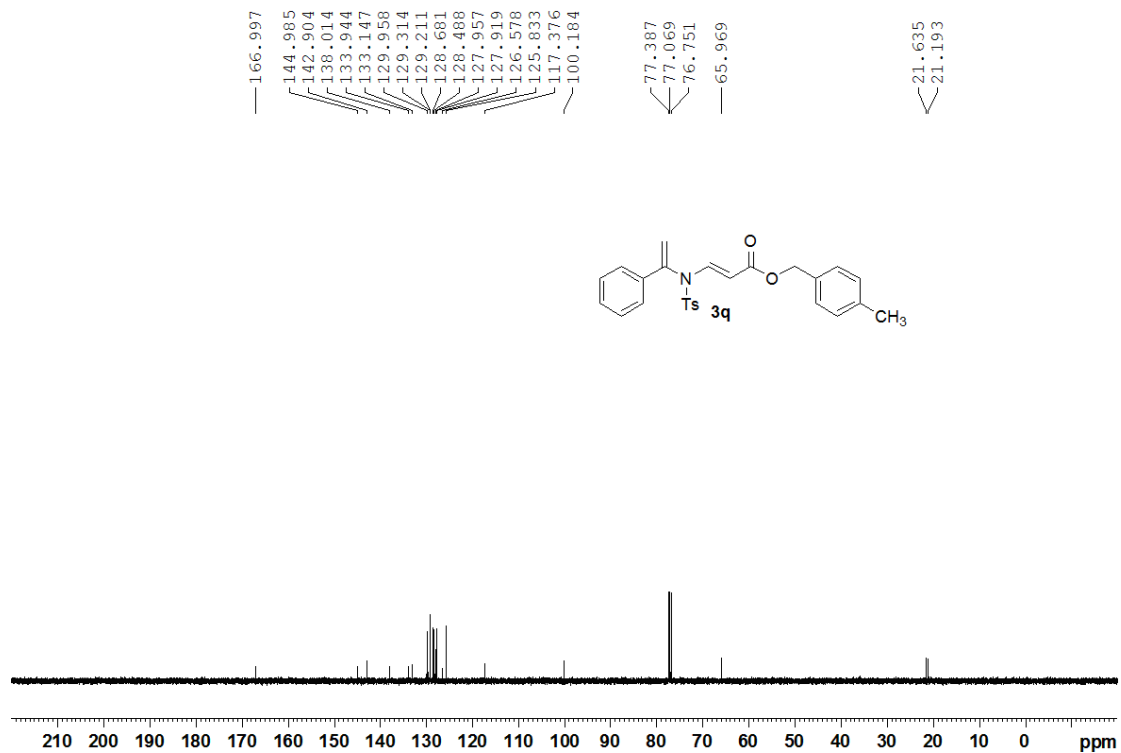

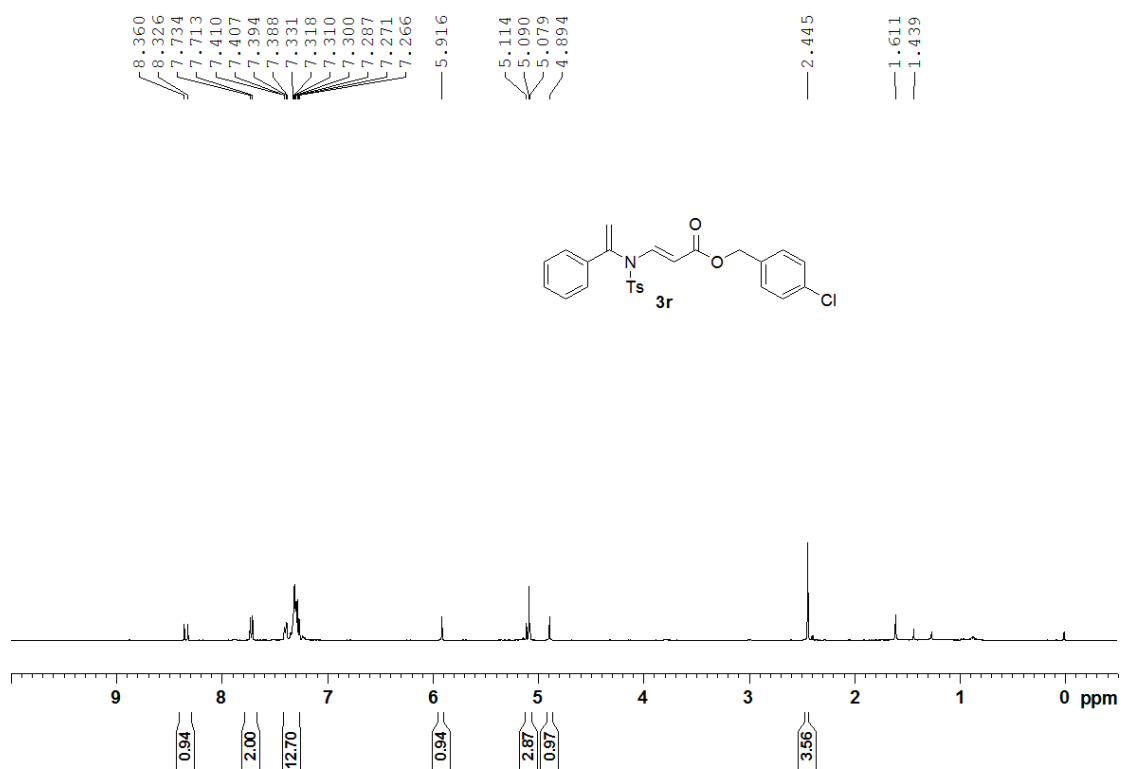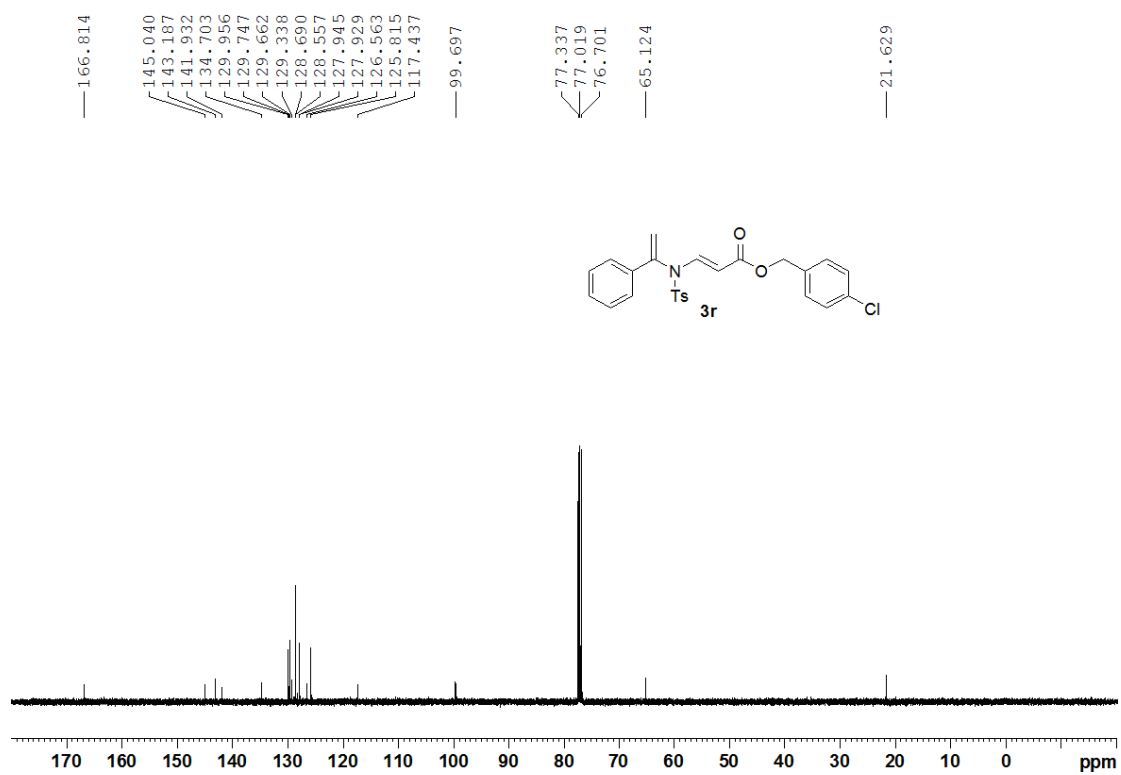

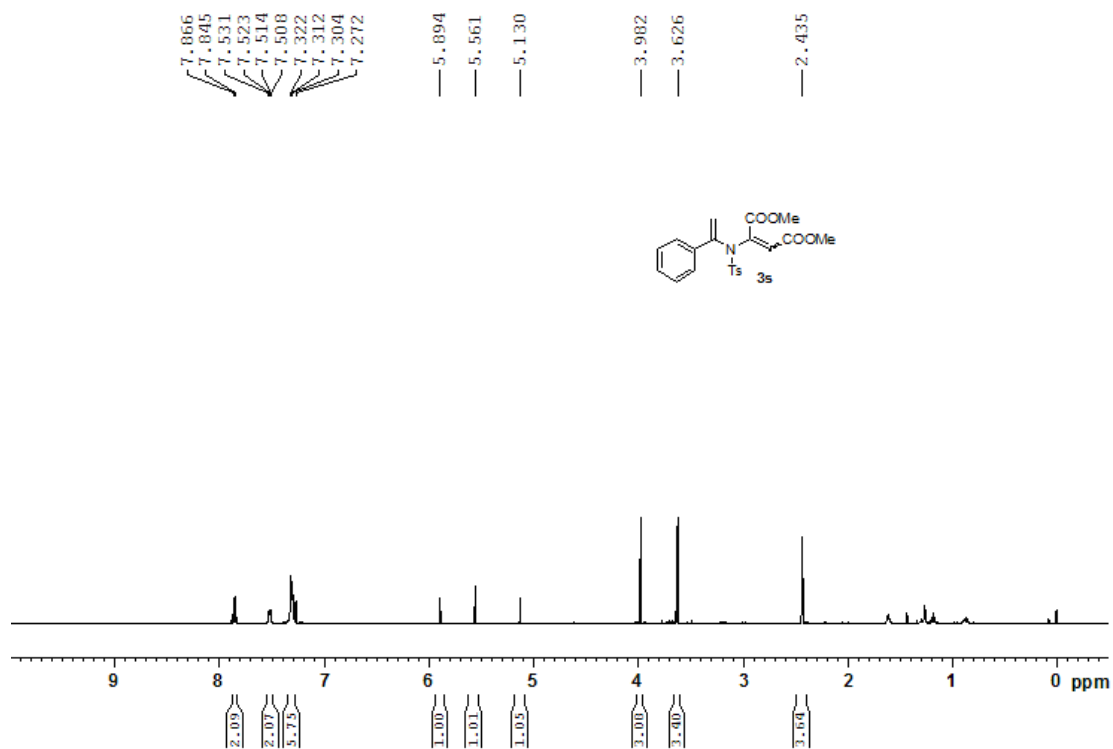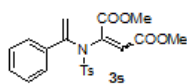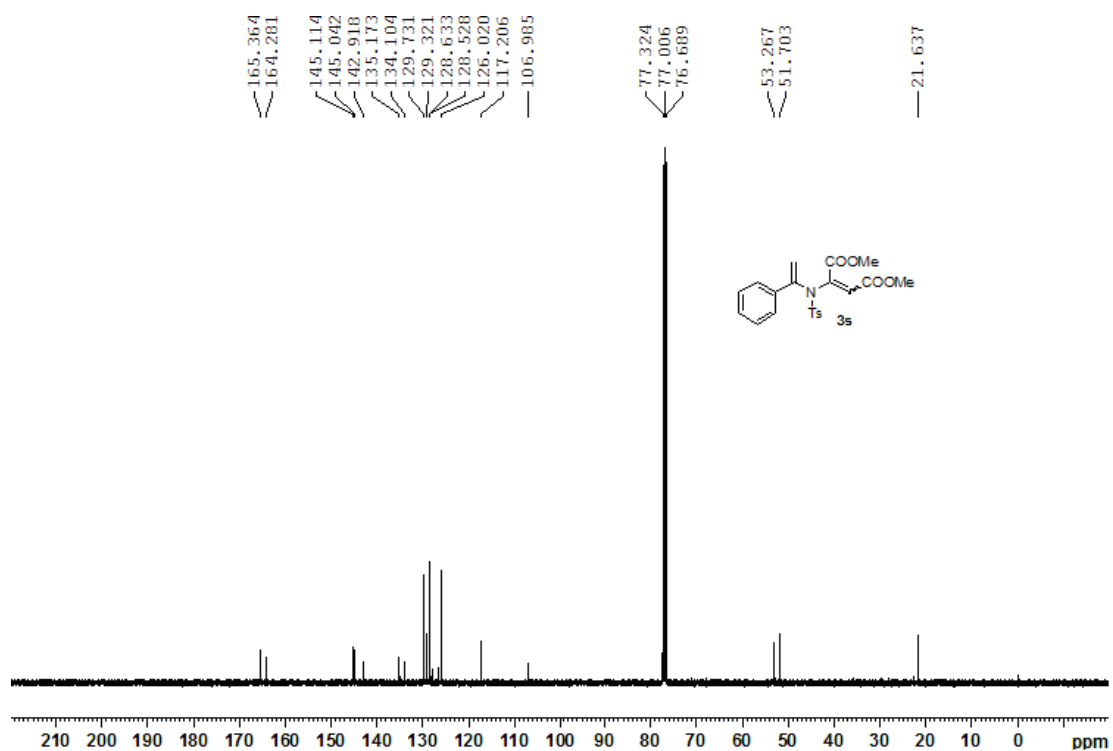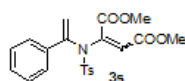

Supplement: c2cc30317e.pdf [file c2cc30317e.pdf]
